# Supplementary material for: Reference Values for Videofluoroscopic Measures of Swallowing: An Update
Source: PubMed Central journal article supplement — J Speech Lang Hear Res. 2023 Sep 5;66(10):3804–24. doi: 10.1044/2023_JSLHR-23-00246 (PMC10713020; doi:10.1044/2023_jslhr-23-00246), 2023-09-05

**Supplemental Material S4.** Scatter plots of data points for each ASPEKT method parameter, by age, sex and consistency.

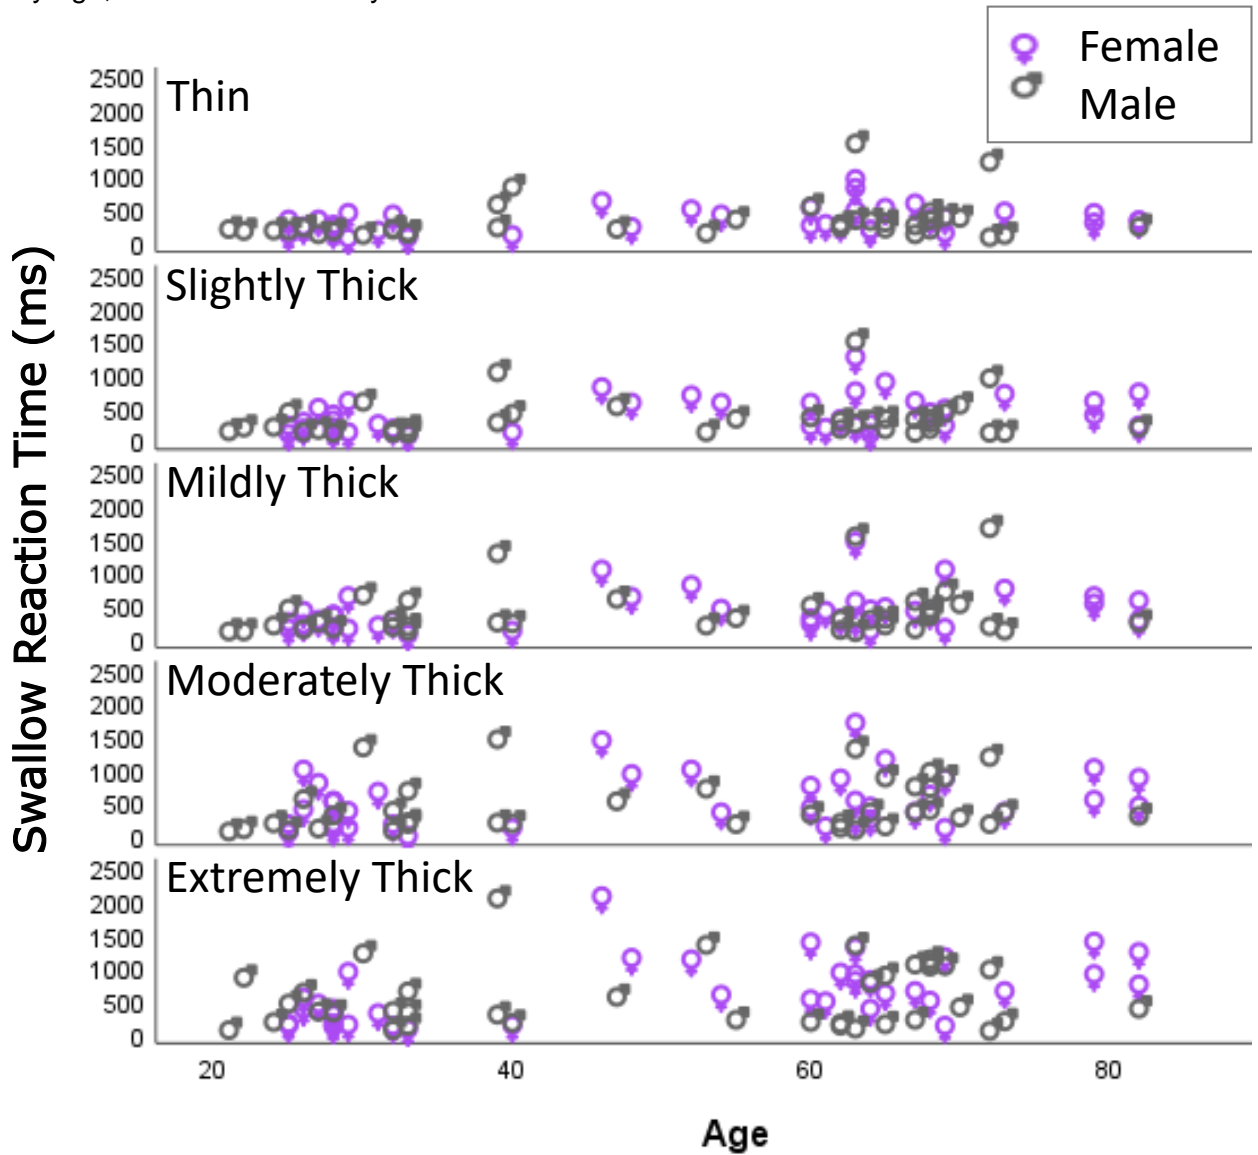

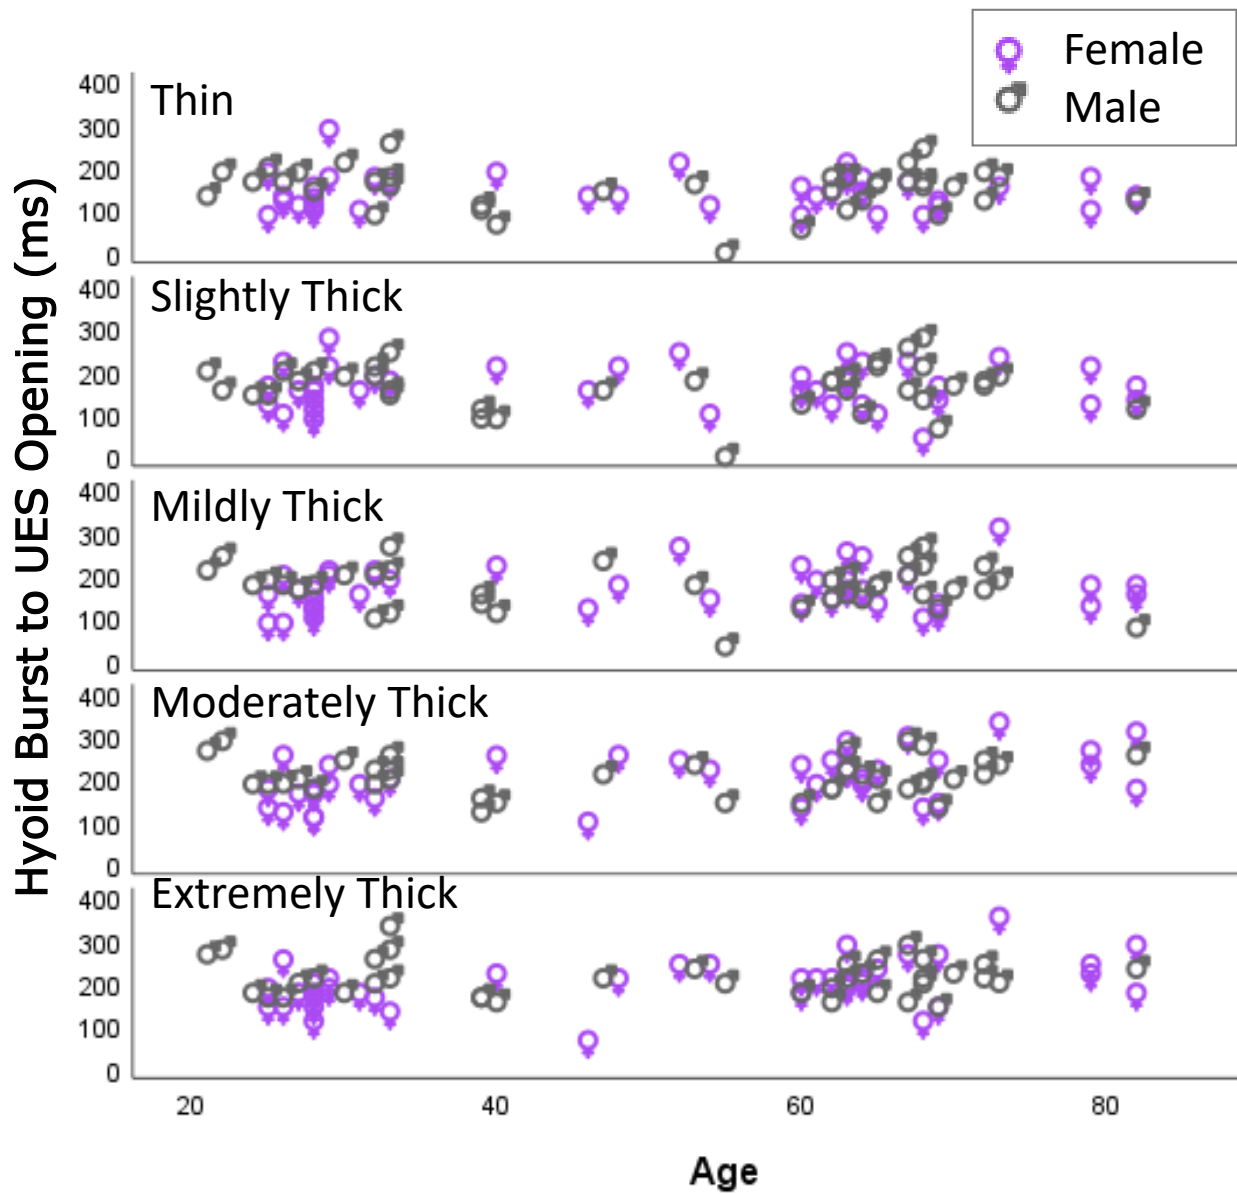

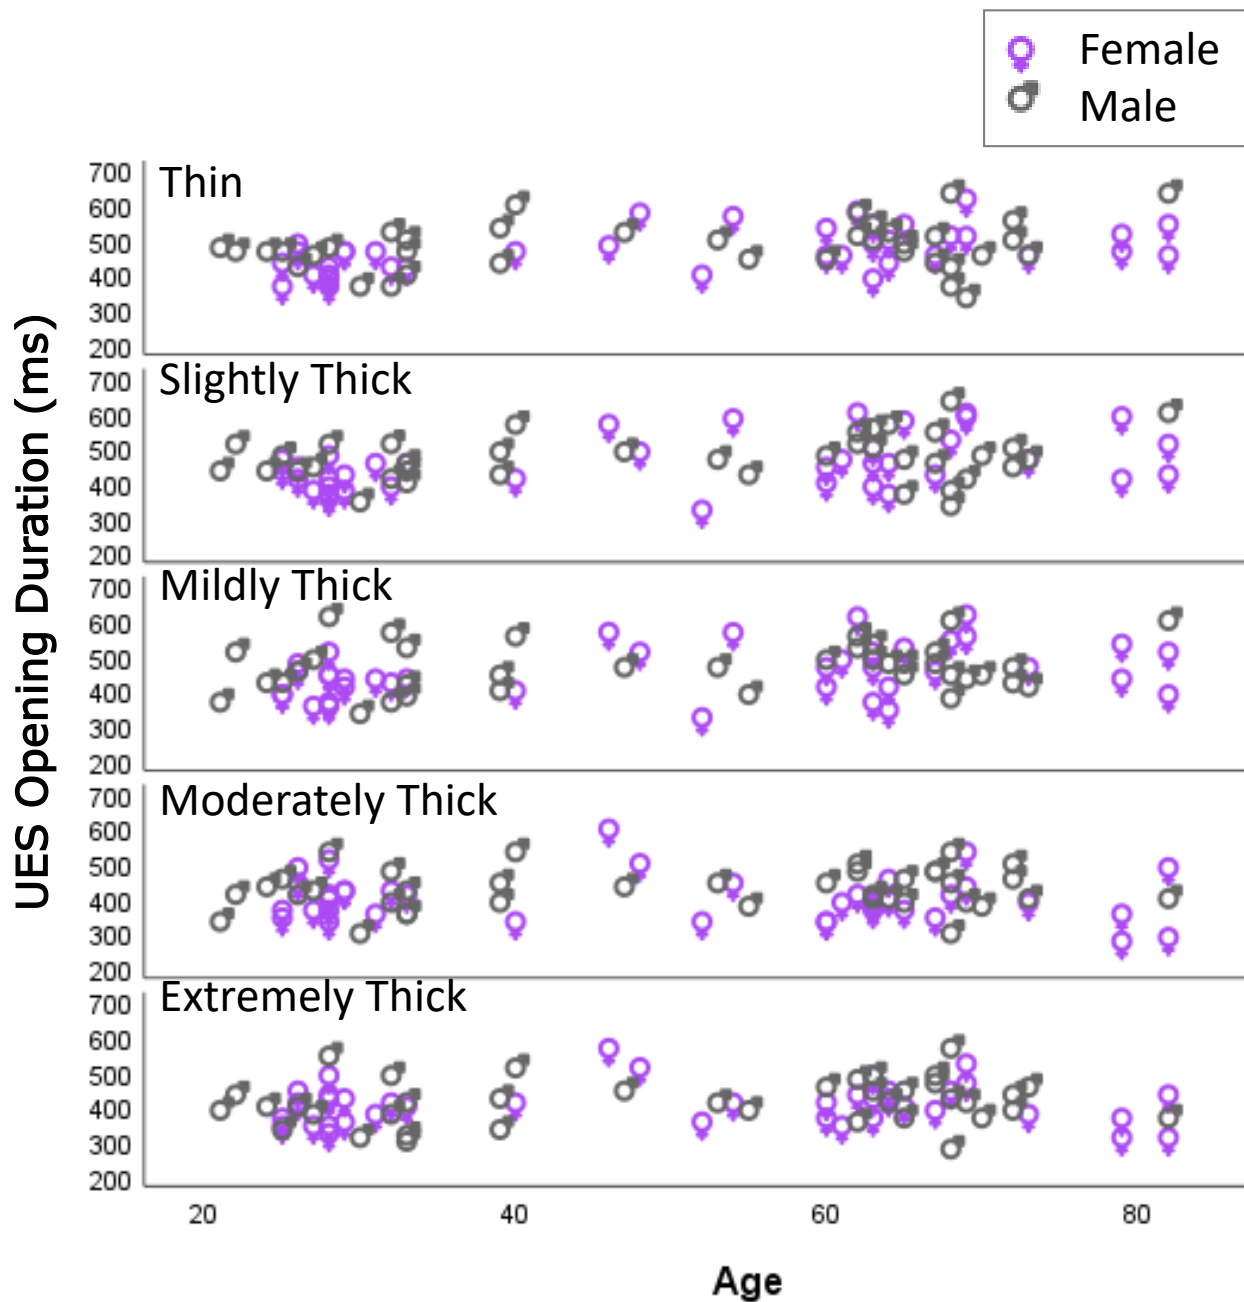

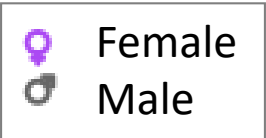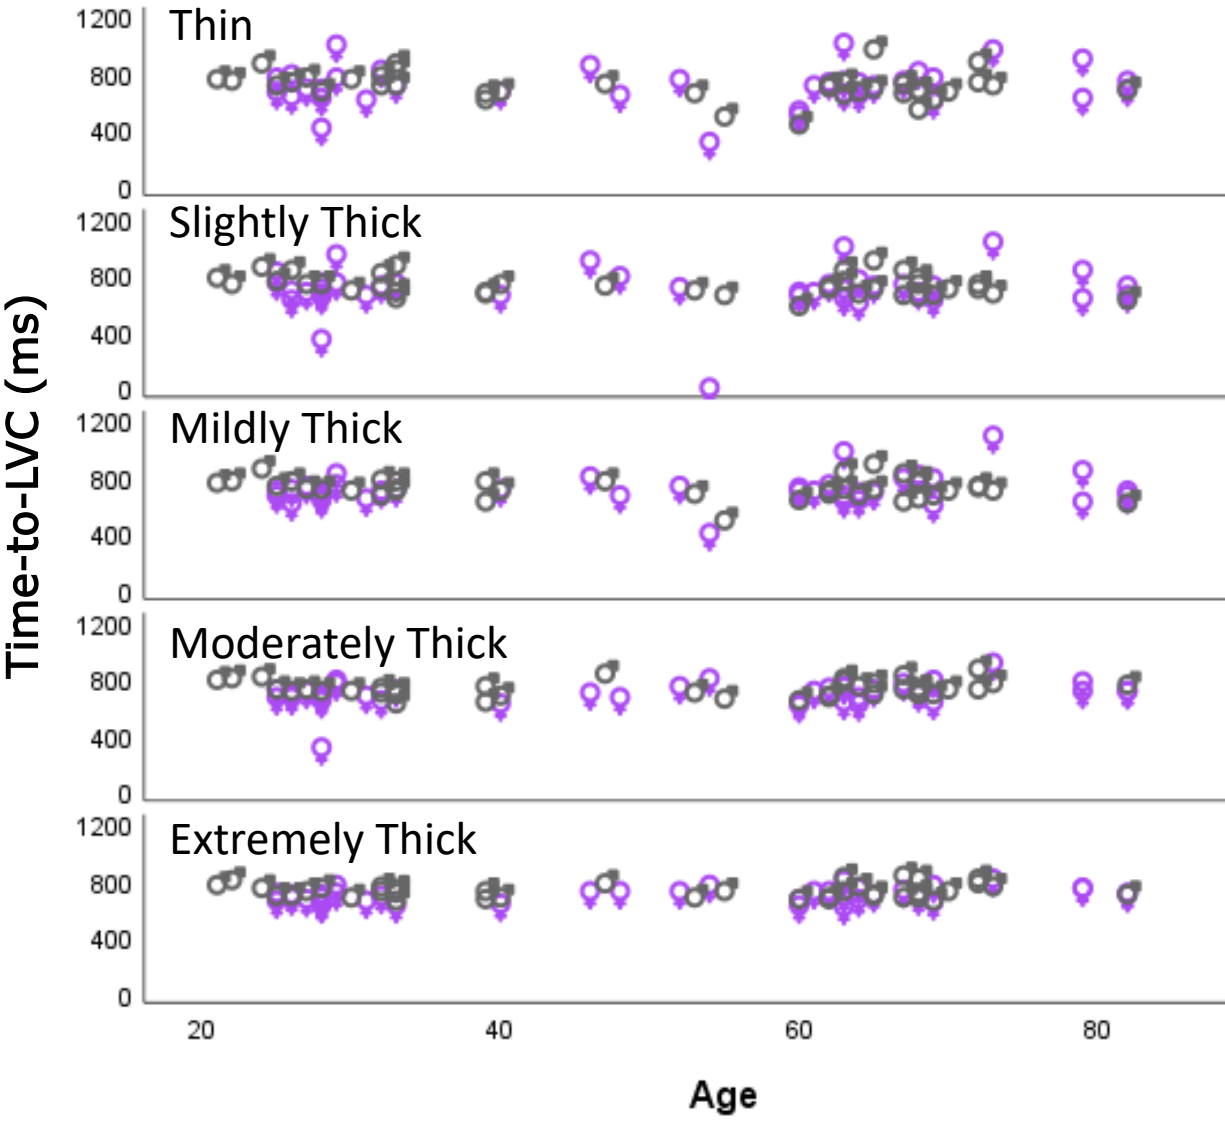

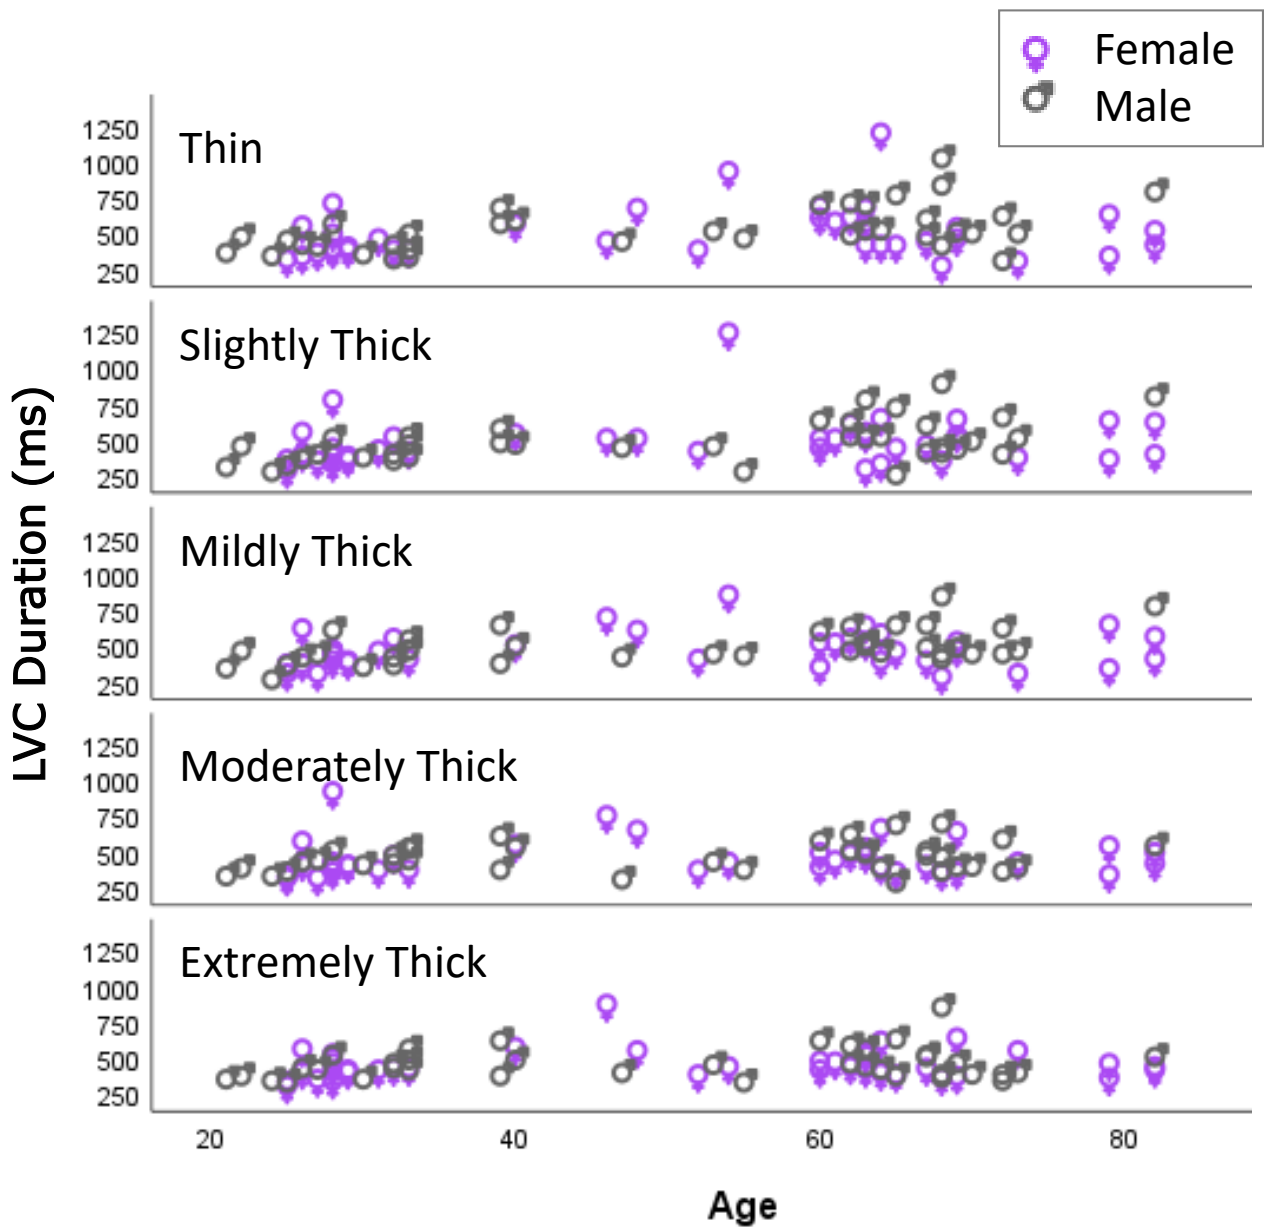

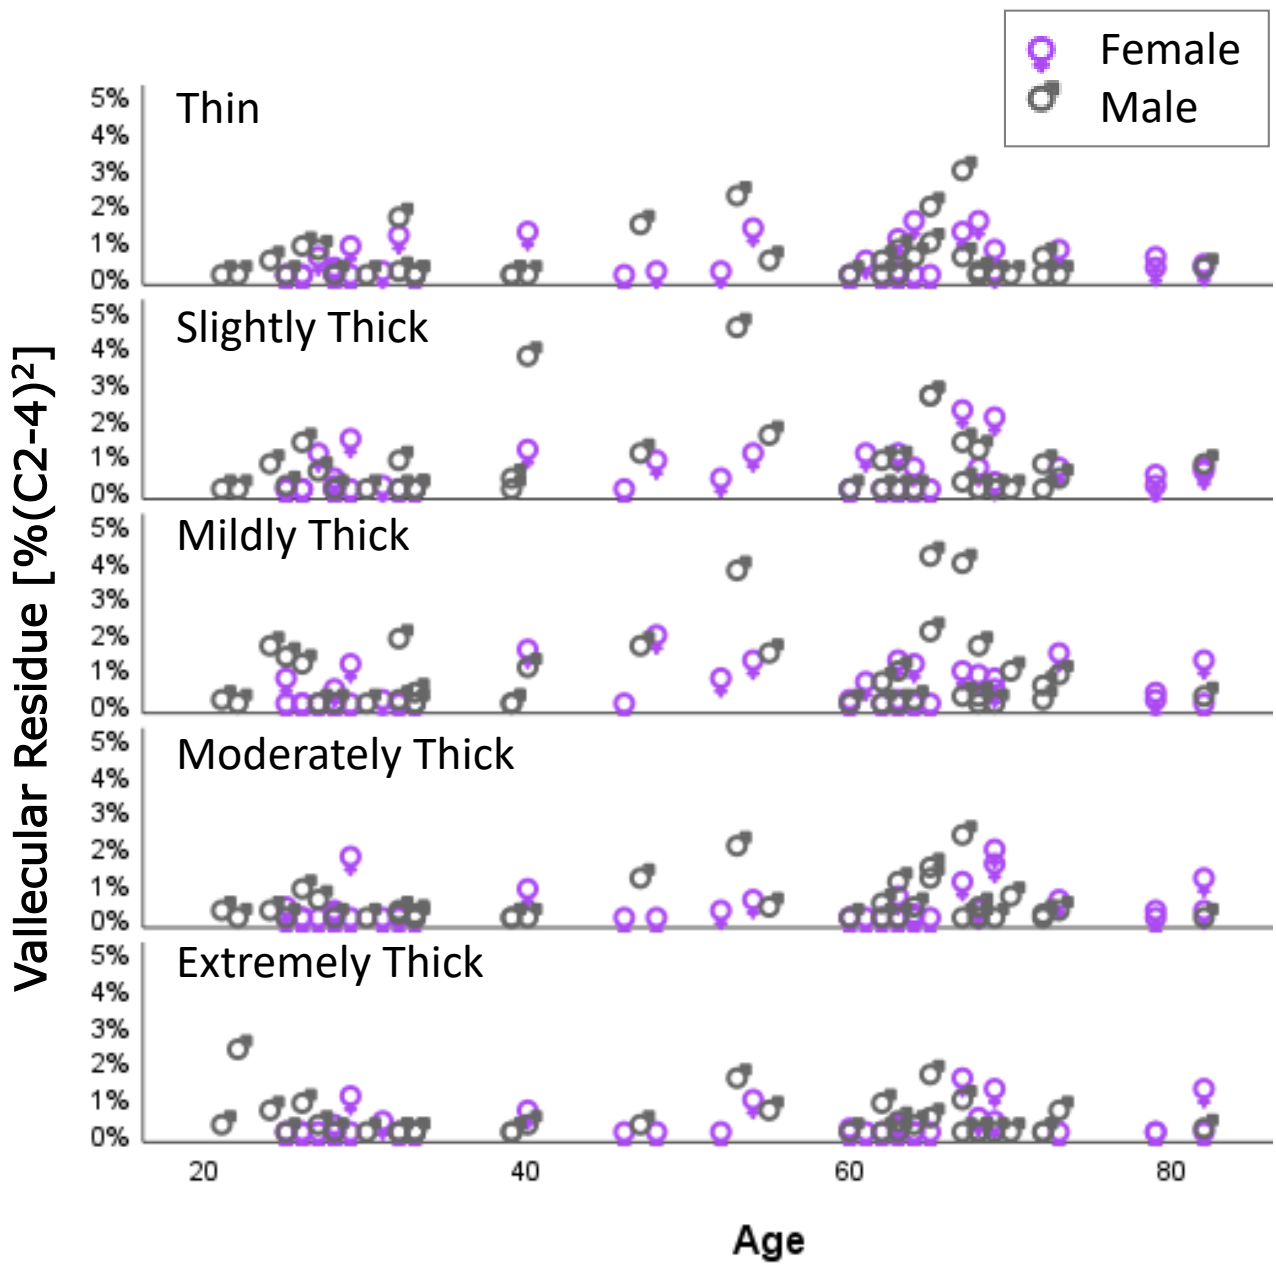

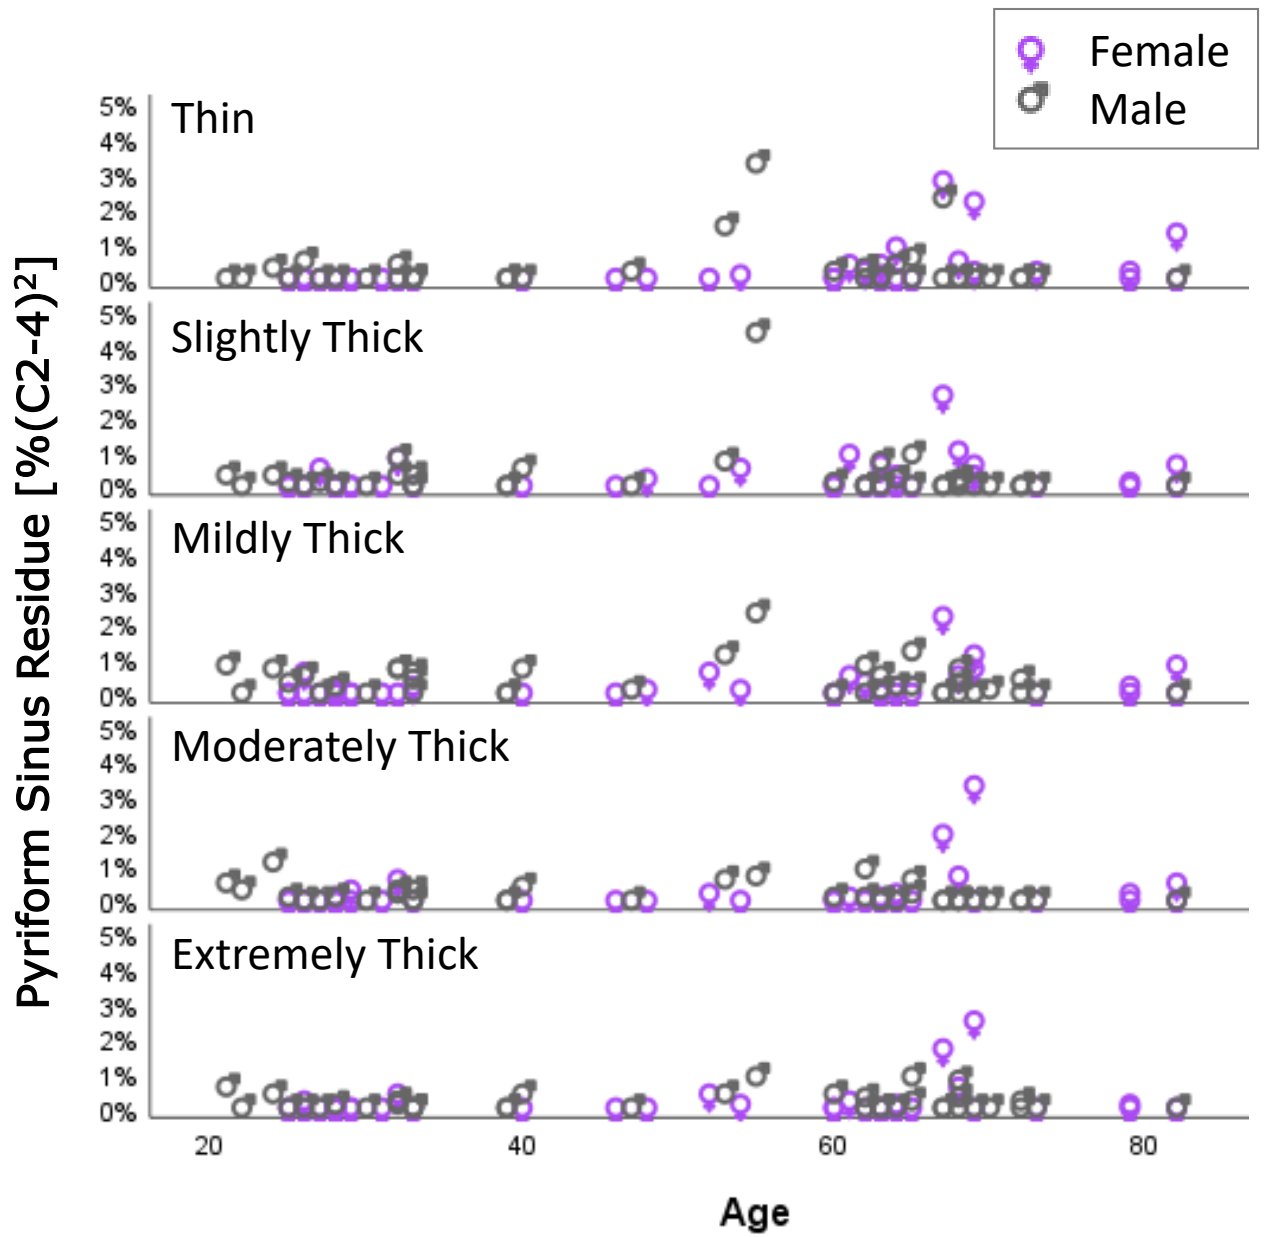

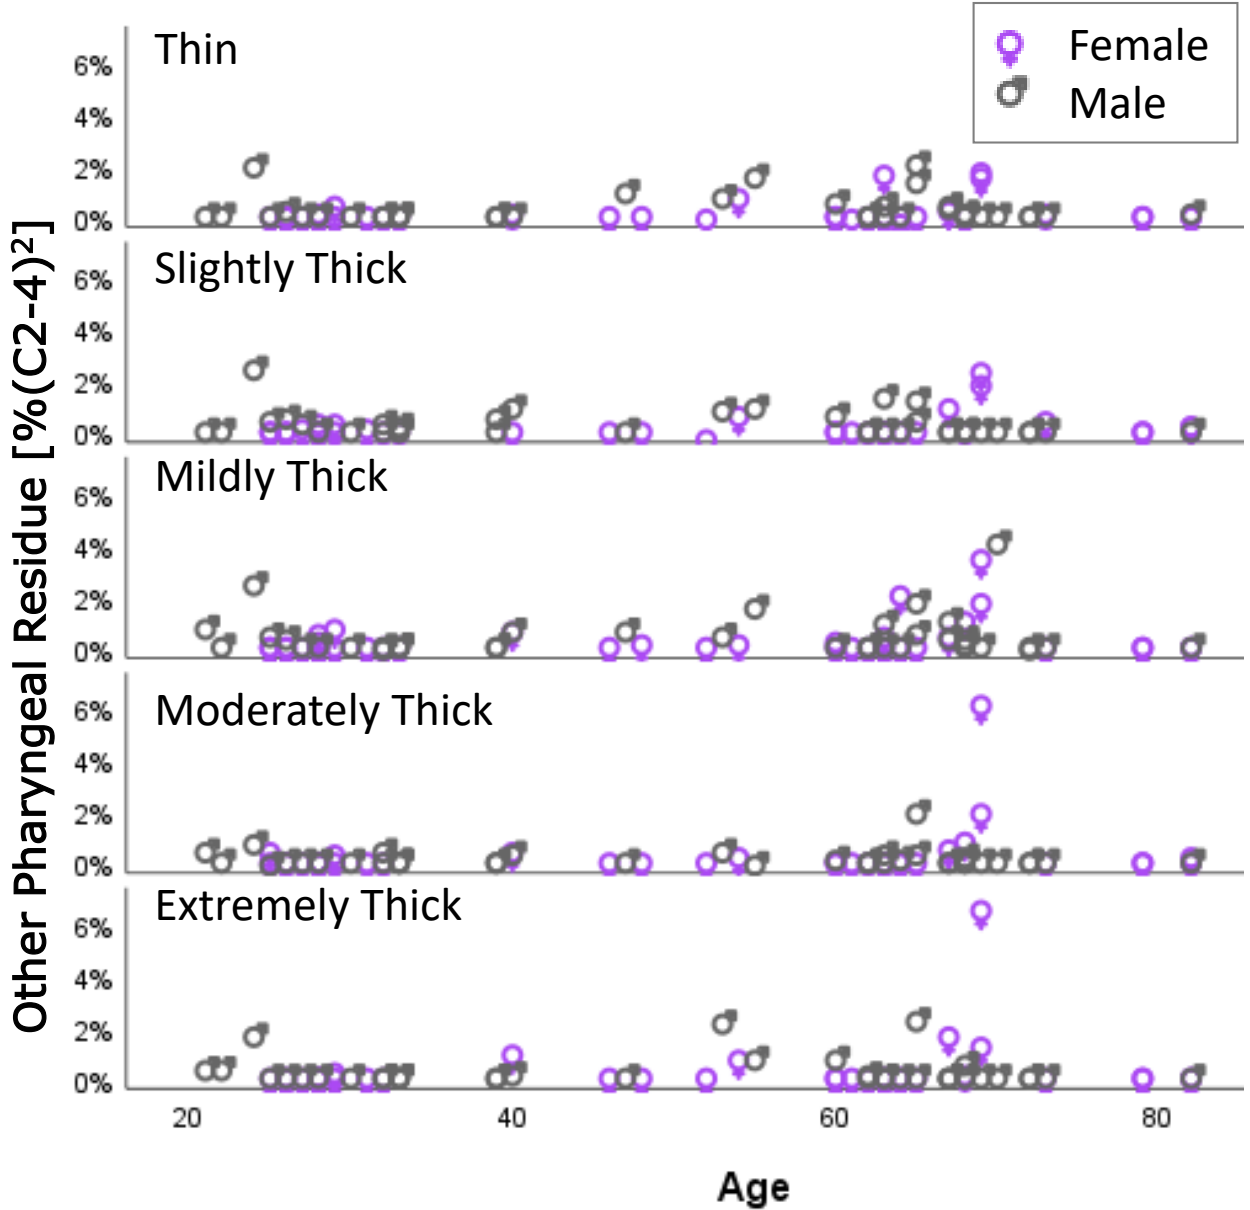



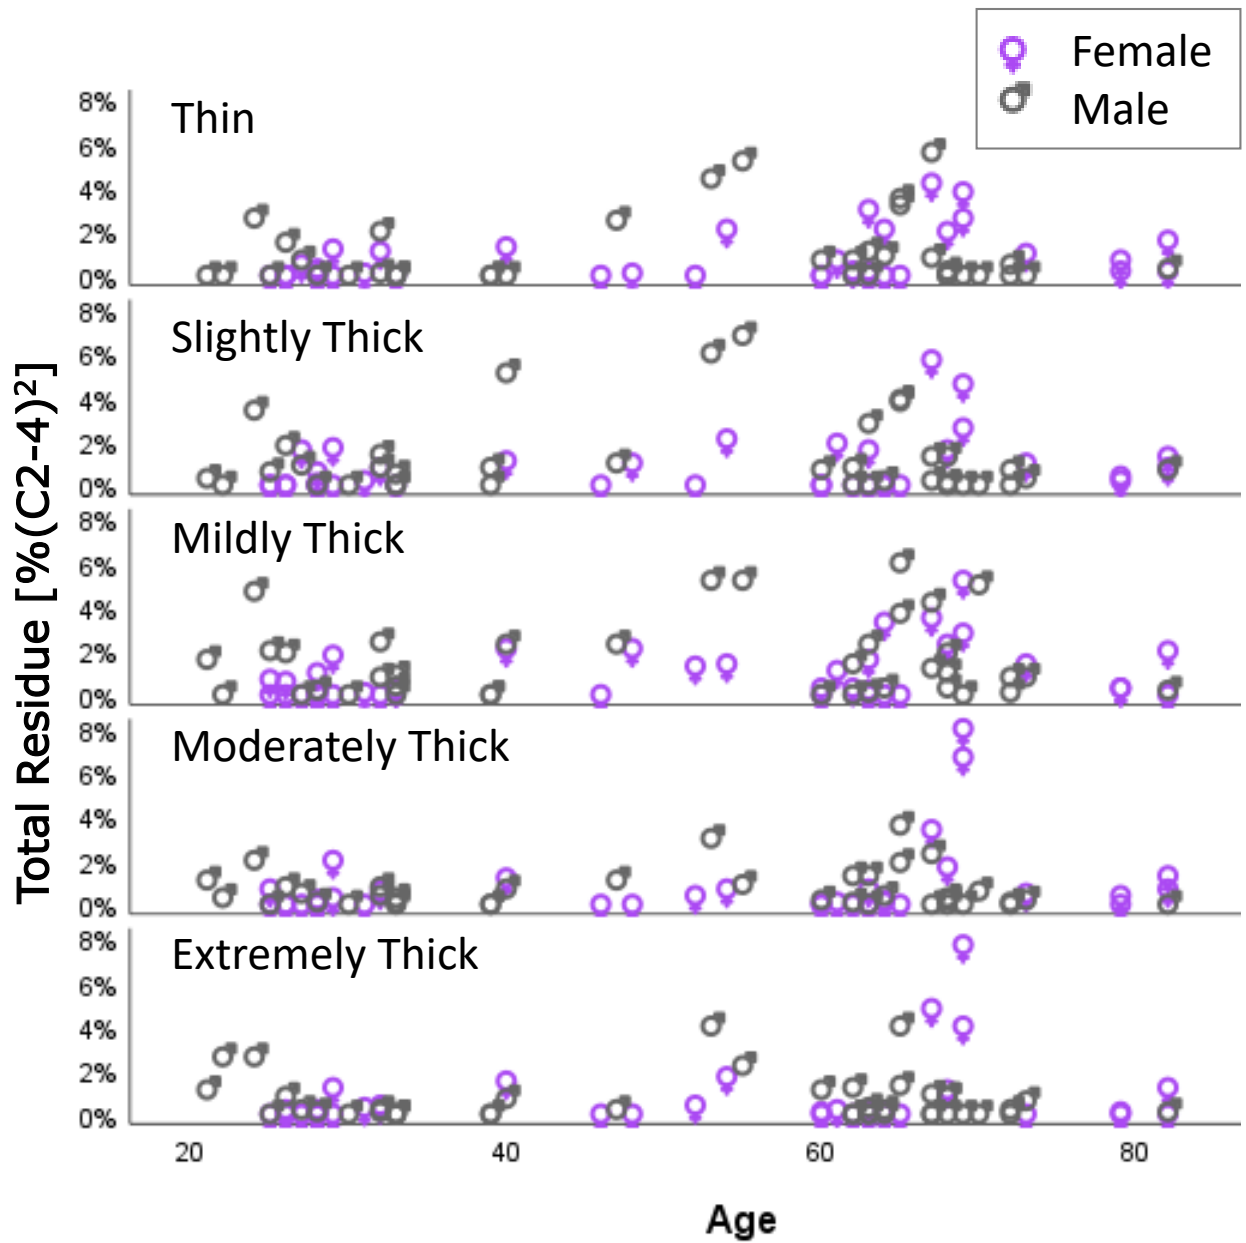

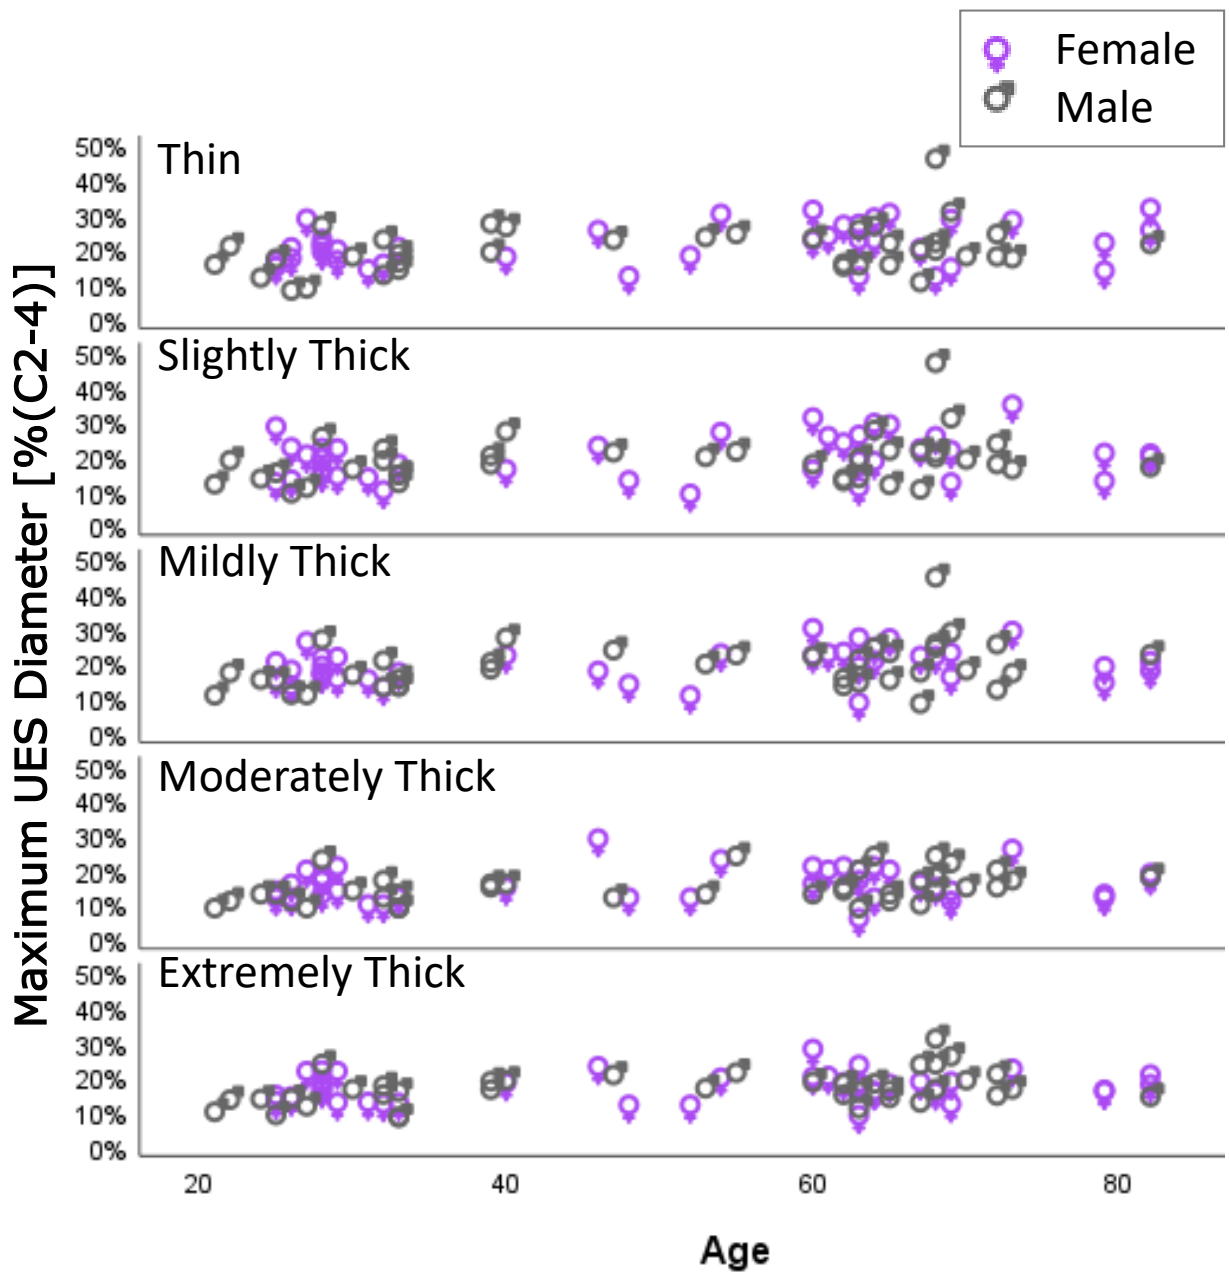

Pharyngeal Area at Maximum Pharyngeal Constriction

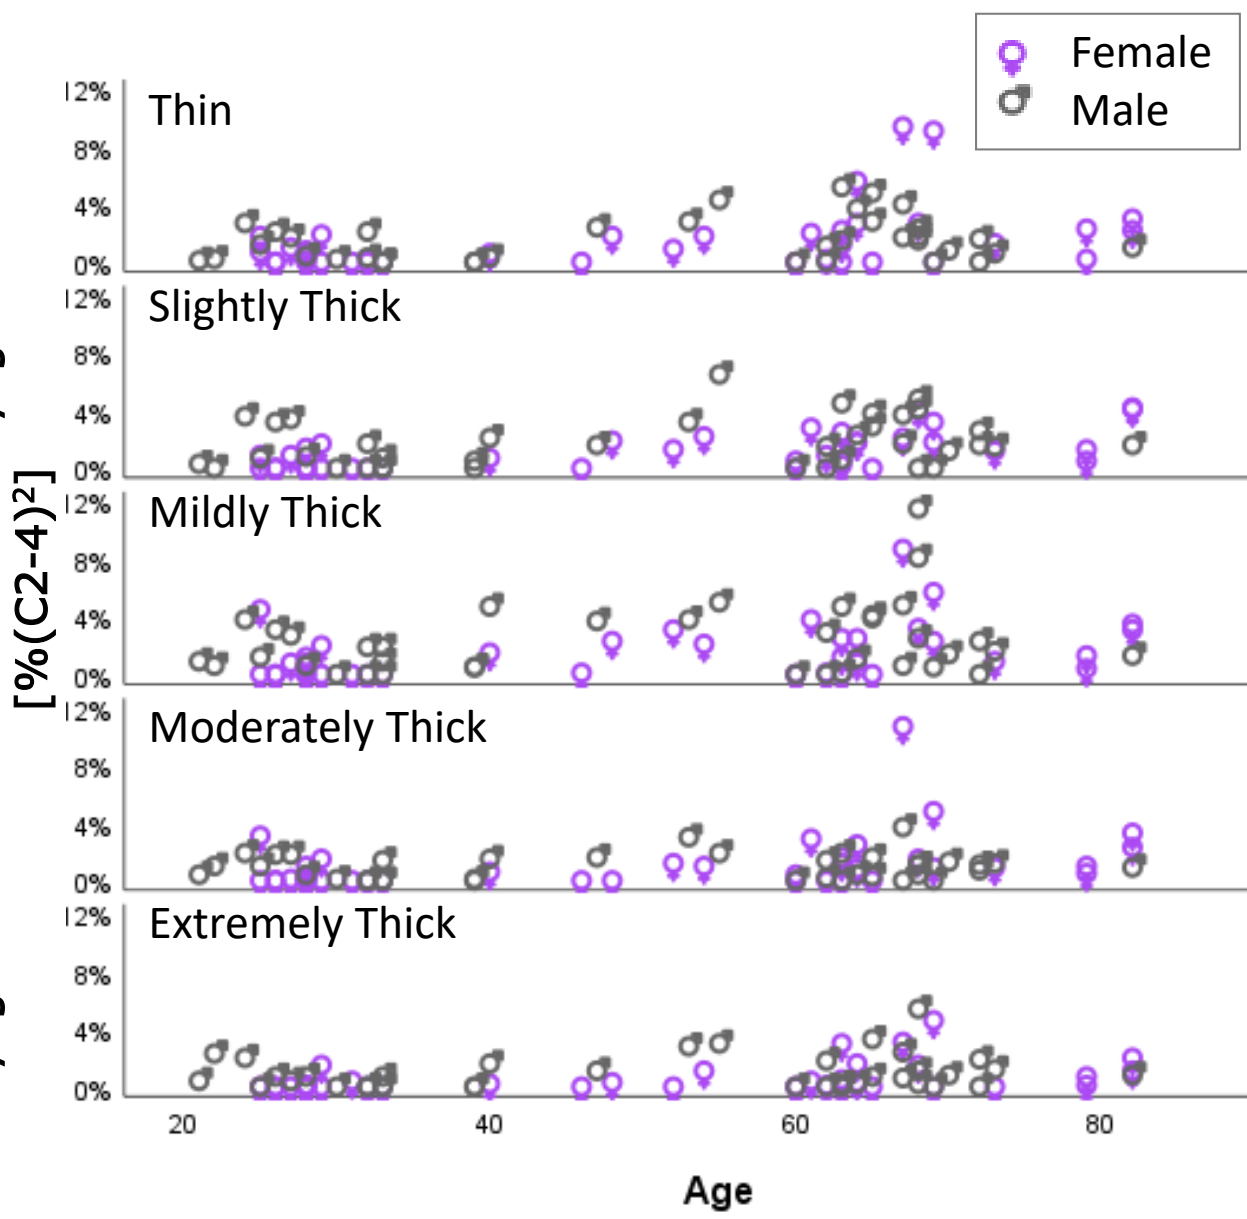

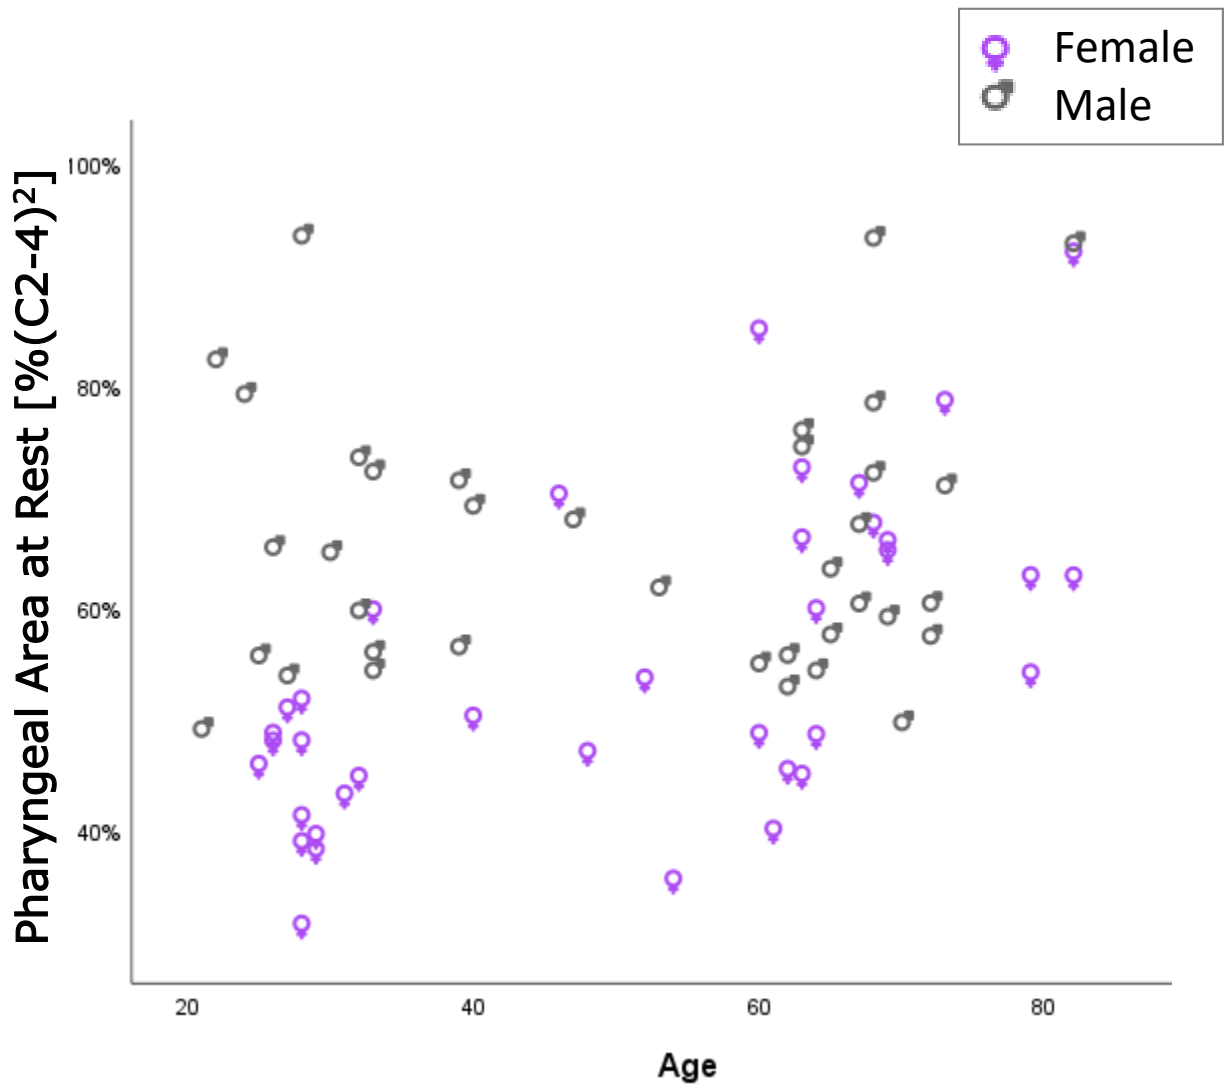

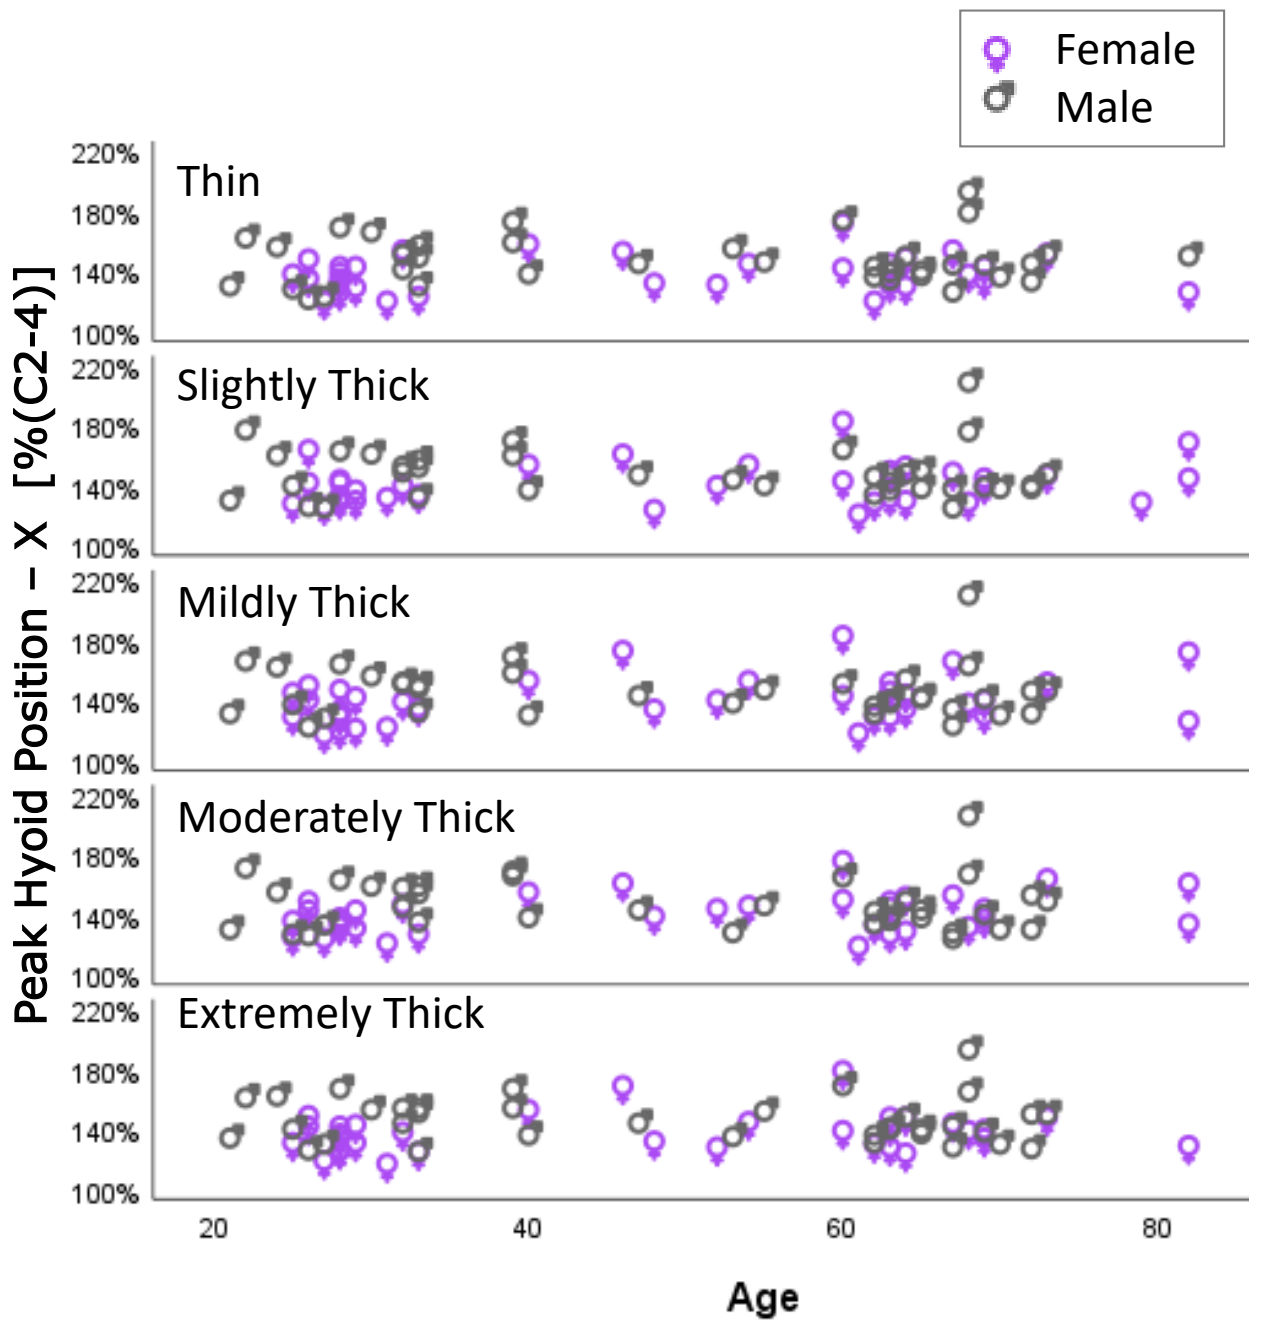

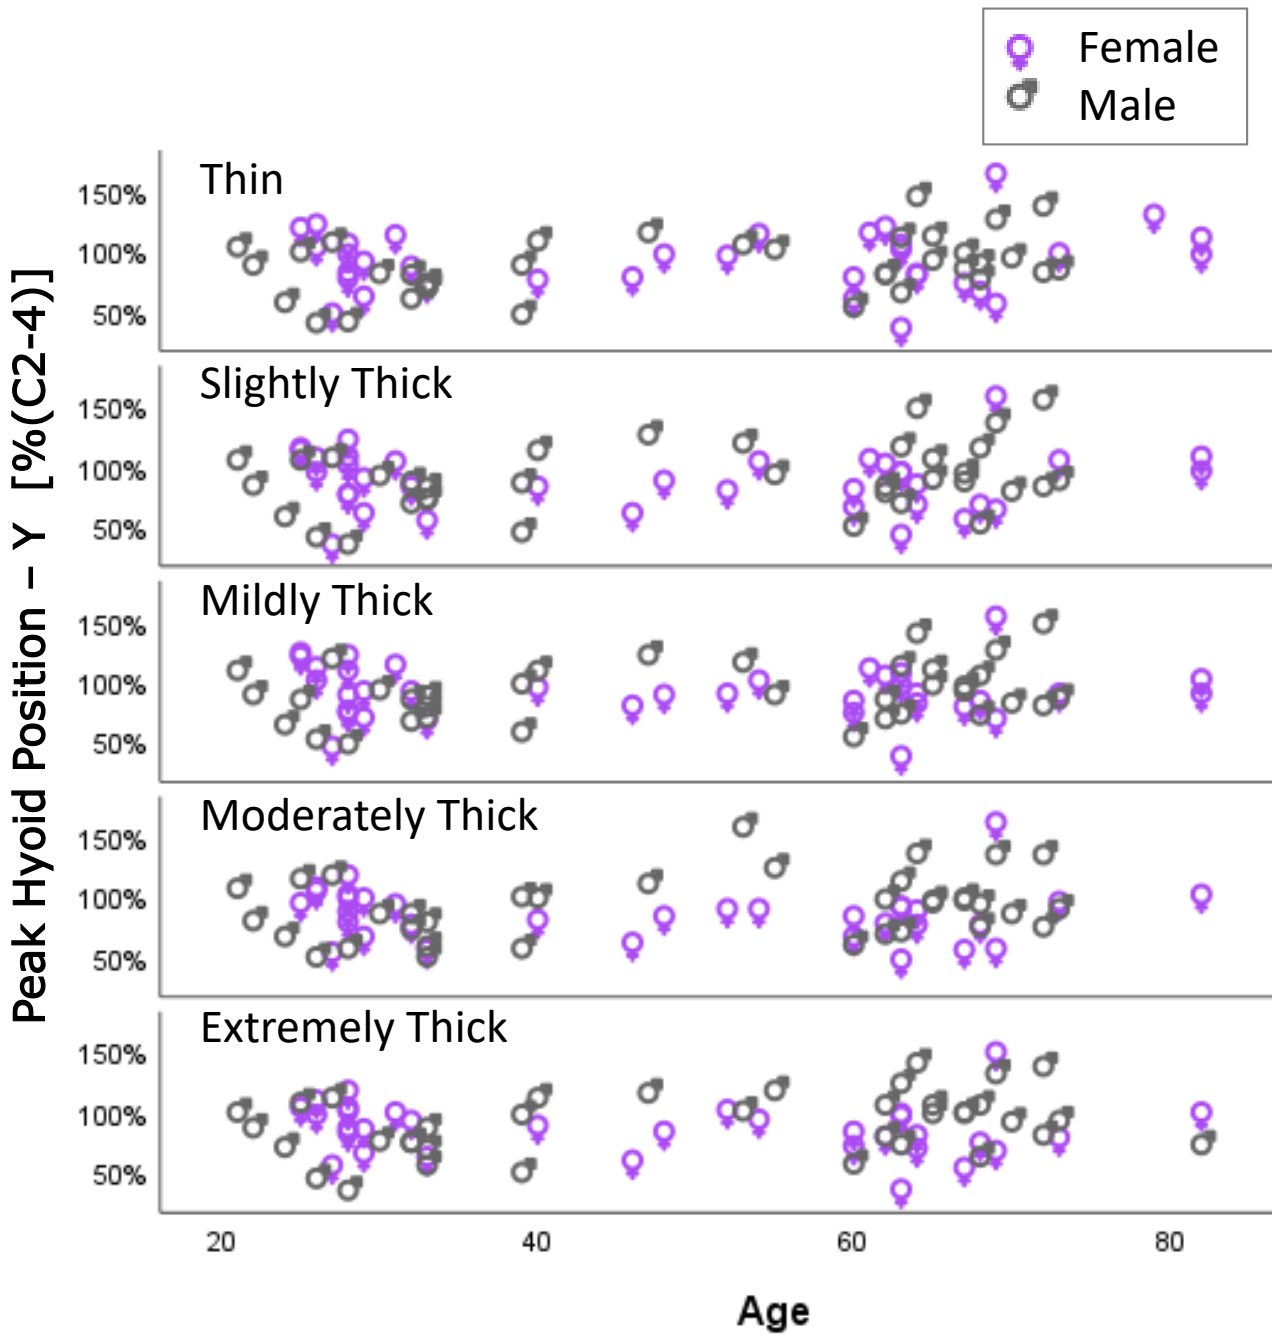

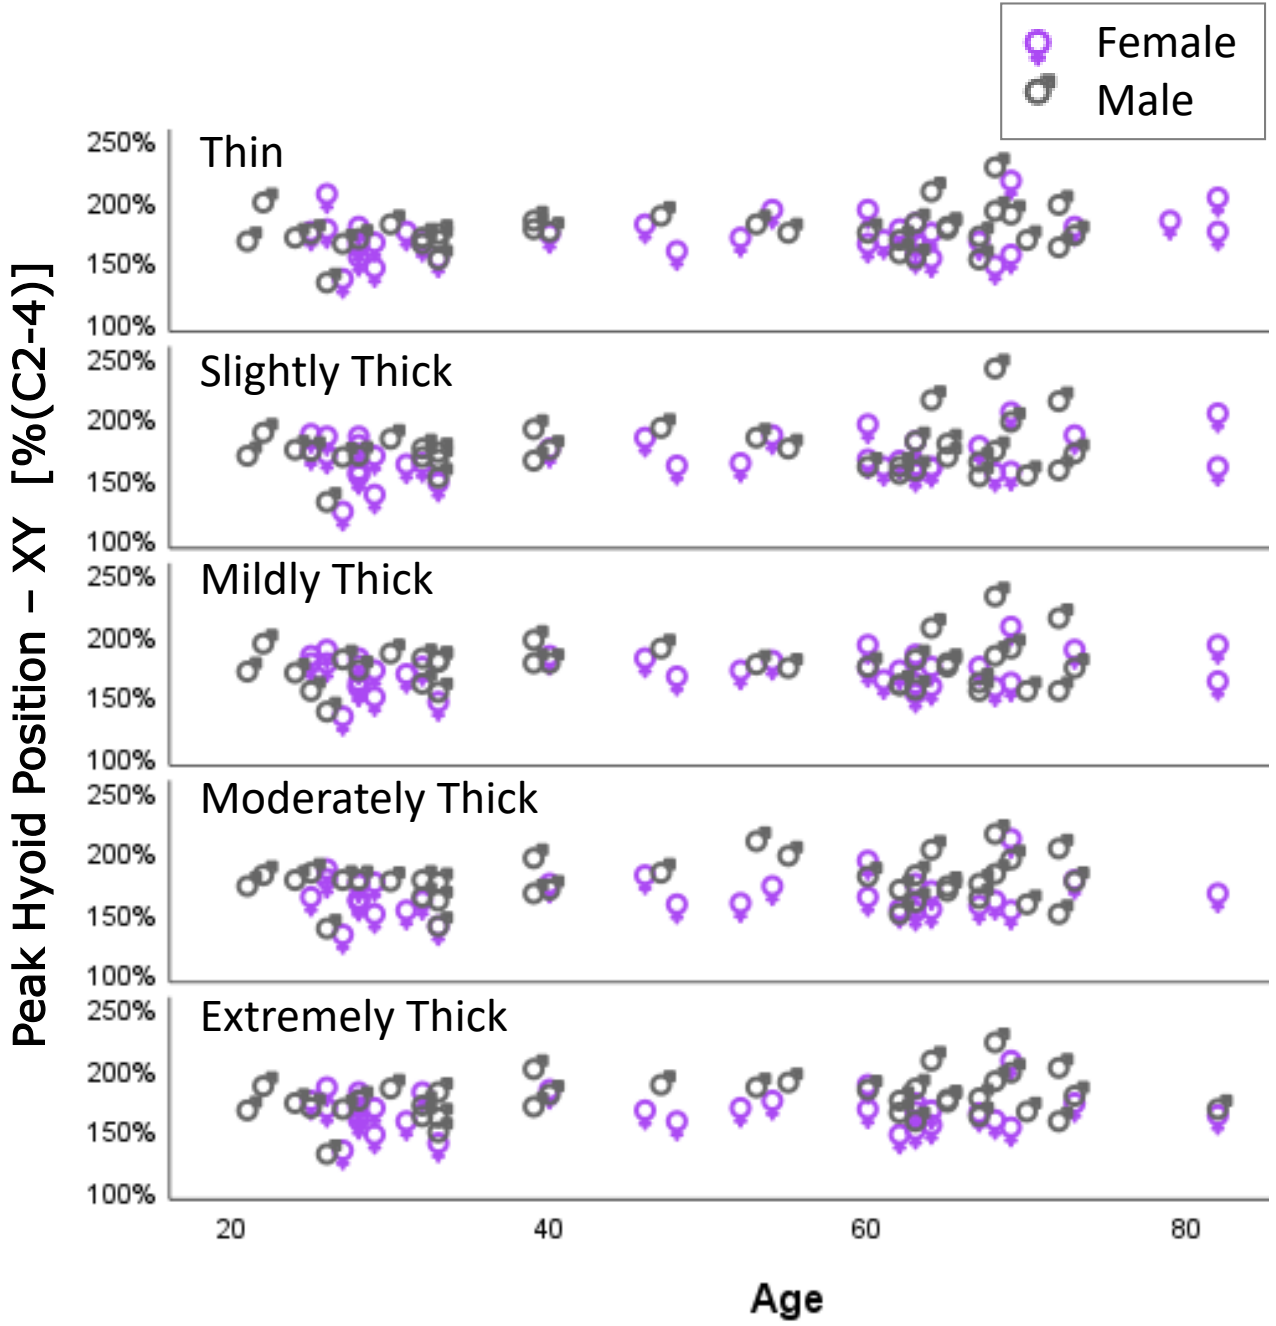

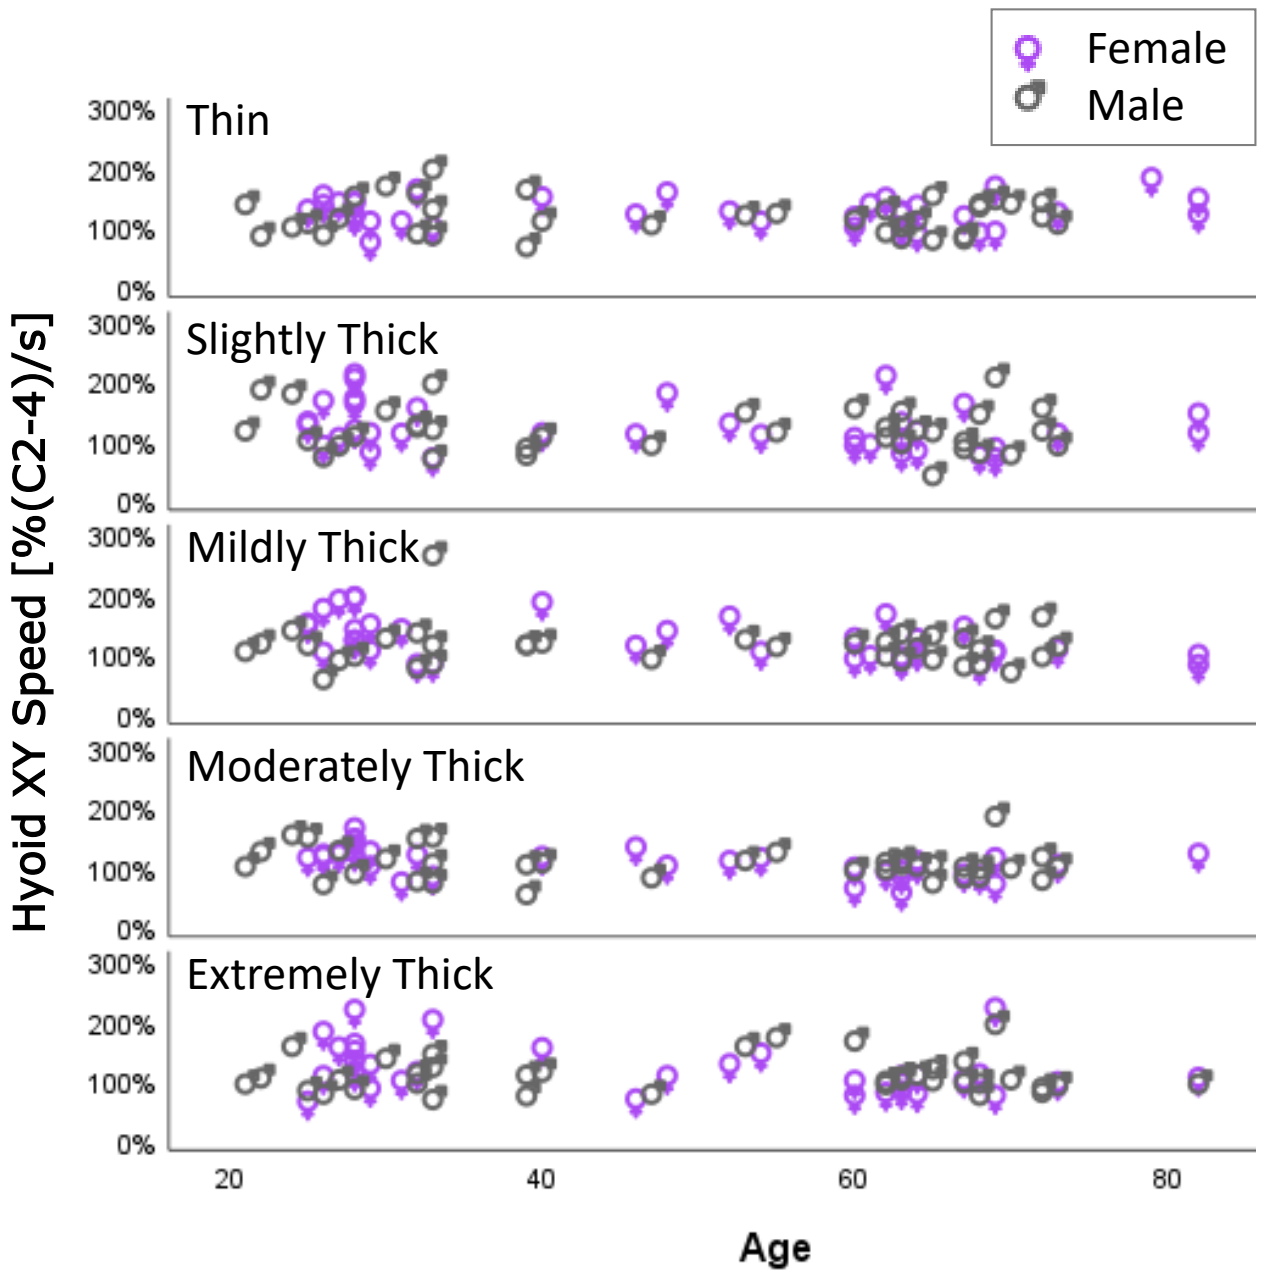

Supplement: JSLHR-66-3804-s004.pdf [file JSLHR-66-3804-s004.pdf]
