# Supplementary material for: Reference Values for Videofluoroscopic Measures of Swallowing: An Update
Source: PubMed Central journal article supplement — J Speech Lang Hear Res. 2023 Sep 5;66(10):3804–24. doi: 10.1044/2023_JSLHR-23-00246 (PMC10713020; doi:10.1044/2023_jslhr-23-00246), 2023-09-05
Supplement: JSLHR-66-3804-s001.pdf [file JSLHR-66-3804-s001.pdf]

**Supplemental Material S1.** Frequencies of pre-consensus inter-rater agreement by absolute difference threshold for ASPEKT method videofluoroscopy ratings.

| Parameter type       | Event                                                        | Absolute difference threshold | Pre-consensus cumulative percent |
|----------------------|--------------------------------------------------------------|-------------------------------|----------------------------------|
| Categorical          | Number of Swallows per Bolus                                 | 0*                            | 100%                             |
|                      | Penetration-Aspiration Scale Score (per swallow)             | 0*                            | 92.50%                           |
|                      |                                                              | 1                             | 97.90%                           |
|                      |                                                              | >1                            | 100%                             |
|                      | LVC Integrity<br>(0 = complete; 1 = partial; 2 = incomplete) | 0*                            | 97%                              |
|                      | > 0                                                          | 100%                          |                                  |
| Frame Identification | Bolus Passing Mandible                                       | 0 frames                      | 52.8%                            |
|                      |                                                              | 1-3 frames <sup>b</sup>       | 90.1%                            |
|                      |                                                              | 4-5 frames <sup>a</sup>       | 93.7%                            |
|                      |                                                              | 6-200 frames                  | 100%                             |
|                      | Hyoid Burst Onset                                            | 0 frames                      | 29.2%                            |
|                      |                                                              | 1-3 frames <sup>b</sup>       | 86.9%                            |
|                      |                                                              | 4-5 frames <sup>a</sup>       | 91.2%                            |
|                      |                                                              | 6-161 frames                  | 100%                             |
|                      | UES Opening                                                  | 0 frames                      | 47.1%                            |
|                      |                                                              | 1-3 frames <sup>b</sup>       | 90.7%                            |
|                      |                                                              | 4-5 frames <sup>a</sup>       | 91.8%                            |
|                      |                                                              | 6-166 frames                  | 100%                             |
|                      | LVC (first frame of most-complete closure)                   | 0 frames                      | 19.1%                            |
|                      |                                                              | 1-3 frames <sup>b</sup>       | 78%                              |

|                                 |                         |       |
|---------------------------------|-------------------------|-------|
|                                 | 4-5 frames <sup>a</sup> | 86.7% |
|                                 | 6-166 frames            | 100%  |
| Maximum UES Opening             | 0 frames                | 31.8% |
|                                 | 1-3 frames <sup>b</sup> | 88.7% |
|                                 | 4-5 frames <sup>a</sup> | 91.6% |
|                                 | 6-164 frames            | 100%  |
| Maximum Pharyngeal Constriction | 0 frames                | 25.7% |
|                                 | 1-3 frames <sup>b</sup> | 86.9% |
|                                 | 4-5 frames <sup>a</sup> | 91.2% |
|                                 | 6-165 frames            | 100%  |
| UES Closure                     | 0 frames                | 24.1% |
|                                 | 1-3 frames <sup>b</sup> | 84.1% |
|                                 | 4-5 frames <sup>a</sup> | 90.1% |
|                                 | 6-165 frames            | 100%  |
| LVC Offset                      | 0 frames                | 68.8% |
|                                 | 1-3 frames <sup>b</sup> | 91.5% |
|                                 | 4-5 frames <sup>a</sup> | 92%   |
|                                 | 6-165 frames            | 100%  |
| Swallow Rest                    | 0 frames                | 15.4% |
|                                 | 1-3 frames <sup>b</sup> | 58.9% |
|                                 | 4-5 frames <sup>a</sup> | 69.2% |
|                                 | 6-167 frames            | 100%  |

|                                                         |                                          |                 |       |
|---------------------------------------------------------|------------------------------------------|-----------------|-------|
| Pixel-Based Measures                                    | Vallecular Residue [% $(C2-4)^2$ ]       | 0               | 58.5% |
|                                                         |                                          | 2%*             | 95.6% |
|                                                         |                                          | 2.1-9.2%        | 100%  |
|                                                         | Pyriform Sinus Residue [% $(C2-4)^2$ ]   | 0               | 53.6% |
|                                                         |                                          | 2.4%*           | 94.4% |
|                                                         |                                          | 7.60%           | 100%  |
|                                                         | Other Pharyngeal Residue [% $(C2-4)^2$ ] | 0               | 78.7% |
|                                                         |                                          | 2.4%*           | 98.7% |
|                                                         |                                          | 2.5-5%          | 100%  |
|                                                         | Maximum UES Diameter [% $(C2-4)$ ]       | 0%              | 0.1%  |
|                                                         |                                          | 7% <sup>b</sup> | 66.6% |
|                                                         |                                          | 8% <sup>a</sup> | 72.5% |
| 8.1-89%                                                 |                                          | 100%            |       |
| Pharyngeal Area at Maximum Constriction [% $(C2-4)^2$ ] | 0%                                       | 16.6%           |       |
|                                                         | 3.5% <sup>b</sup>                        | 81.6%           |       |
|                                                         | 16% <sup>a</sup>                         | 99.6%           |       |
|                                                         | 16.1-45.6%                               | 100%            |       |
| Pharyngeal Area at Rest [% $(C2-4)^2$ ]                 | 0.04%                                    | 0.1%            |       |
|                                                         | 20%*                                     | 65.7%           |       |
|                                                         | 21-149%                                  | 100%            |       |

<sup>a</sup> Initial threshold used for flagging consensus review

<sup>b</sup> Updated threshold used for flagging consensus review

\* Threshold used for flagging consensus review
