# Supplementary material for: Reference Values for Videofluoroscopic Measures of Swallowing: An Update
Source: PubMed Central journal article supplement — J Speech Lang Hear Res. 2023 Sep 5;66(10):3804–24. doi: 10.1044/2023_JSLHR-23-00246 (PMC10713020; doi:10.1044/2023_jslhr-23-00246), 2023-09-05
Supplement: JSLHR-66-3804-s002.pdf [file JSLHR-66-3804-s002.pdf]

**Supplemental Material S2.** Intra-class correlations for pre-consensus inter-rater agreement for ASPEKT method videofluoroscopy ratings.

| Parameter type       | Event/parameter                            | Intra-class correlation* | 95% Confidence Interval |             |
|----------------------|--------------------------------------------|--------------------------|-------------------------|-------------|
|                      |                                            |                          | Lower bound             | Upper bound |
| Frame Identification | Overall                                    | 0.957                    | 0.956                   | 0.958       |
|                      | Bolus Passing Mandible                     | 0.972                    | 0.969                   | 0.974       |
|                      | Hyoid Burst Onset                          | 0.950                    | 0.946                   | 0.954       |
|                      | UES Opening                                | 0.951                    | 0.947                   | 0.955       |
|                      | LVC (first frame of most-complete closure) | 0.944                    | 0.939                   | 0.948       |
|                      | Maximum UES Opening                        | 0.950                    | 0.945                   | 0.954       |
|                      | Maximum Pharyngeal Constriction            | 0.945                    | 0.940                   | 0.949       |
|                      | UES Closure                                | 0.946                    | 0.942                   | 0.951       |
|                      | LVC Offset                                 | 0.949                    | 0.945                   | 0.953       |
|                      | Swallow Rest                               | 0.938                    | 0.933                   | 0.943       |
| Pixel-Based Measures | Overall                                    | 0.946                    | 0.944                   | 0.949       |
|                      | Vallecular Residue                         | 0.864                    | 0.851                   | 0.876       |
|                      | Pyriiform Sinus Residue                    | 0.426                    | 0.373                   | 0.474       |
|                      | Other Pharyngeal Residue                   | 0.448                    | 0.337                   | 0.541       |
|                      | Maximum UES Diameter                       | 0.375                    | 0.318                   | 0.427       |
|                      | Pharyngeal Area at Maximum Constriction    | 0.461                    | 0.412                   | 0.506       |
|                      | Pharyngeal Area at Rest                    | 0.442                    | 0.381                   | 0.496       |

\*Two-way mixed effects model, average measures of consistency.
