# Supplementary material for: Reference Values for Videofluoroscopic Measures of Swallowing: An Update
Source: PubMed Central journal article supplement — J Speech Lang Hear Res. 2023 Sep 5;66(10):3804–24. doi: 10.1044/2023_JSLHR-23-00246 (PMC10713020; doi:10.1044/2023_jslhr-23-00246), 2023-09-05
Supplement: JSLHR-66-3804-s003.pdf [file JSLHR-66-3804-s003.pdf]

**Supplemental Material S3:** Reference percentile estimates with 90% confidence intervals (CIs) for ASPEKT method quantitative videofluoroscopy measures by liquid consistency.

|                                        | IDDSI Level 0<br>(Thin) |             | IDDSI Level 1<br>(Slightly thick) |             | IDDSI Level 2<br>(Mildly thick) |              | IDDSI Level 3<br>(Moderately thick) |              | IDDSI Level 4<br>(Extremely thick) |              |
|----------------------------------------|-------------------------|-------------|-----------------------------------|-------------|---------------------------------|--------------|-------------------------------------|--------------|------------------------------------|--------------|
|                                        | Estimate                | CI          | Estimate                          | CI          | Estimate                        | CI           | Estimate                            | CI           | Estimate                           | CI           |
| <b>Swallow Reaction Time (ms)</b>      | -                       | -           | -                                 | -           | -                               | -            | -                                   | -            | -                                  | -            |
| N                                      | 75                      |             | 77                                |             | 77                              |              | 76                                  |              | 77                                 |              |
| Outliers (n)                           | 1                       |             | 0                                 |             | 0                               |              | 1                                   |              | 0                                  |              |
| 2.5th percentile                       | -33                     | (-33, 0)    | -66                               | (-66, 33)   | -33                             | (-66, 33)    | -66                                 | (-66, 33)    | -66                                | (-99, -66)   |
| 5th percentile                         | 0                       | (-33, 0)    | -33                               | (-33, 0)    | -33                             | (-33, 0)     | -33                                 | (-66, 0)     | -66                                | (-66, -33)   |
| 25th percentile                        | 66                      | (33, 66)    | 33                                | (33, 66)    | 66                              | (66, 66)     | 99                                  | (66, 99)     | 132                                | (99, 132)    |
| Median (50th percentile)               | 132                     |             | 132                               |             | 165                             |              | 264                                 |              | 363                                |              |
| 75th percentile                        | 396                     | (330, 4955) | 396                               | (330, 495)  | 528                             | (462, 660)   | 660                                 | (561, 792)   | 792                                | (660, 957)   |
| 95th percentile                        | 825                     | (693, 990)  | 792                               | (693, 924)  | 1089                            | (891, 1320)  | 1254                                | (1089, 1452) | 1452                               | (1254, 1683) |
| 97.5th percentile                      | 957                     | (792, 1122) | 924                               | (792, 1089) | 1287                            | (1089, 1518) | 1452                                | (1254, 1716) | 1683                               | (1419, 1914) |
| <b>Hyoid-Burst-to-UES-Opening (ms)</b> | -                       | -           | -                                 | -           | -                               | -            | -                                   | -            | -                                  | -            |
| N                                      | 75                      |             | 75                                |             | 77                              |              | 77                                  |              | 77                                 |              |
| Outliers (n)                           | 2                       |             | 2                                 |             | 1                               |              | 0                                   |              | 1                                  |              |
| 2.5th percentile                       | 33                      | (0, 33)     | 33                                | (33, 33)    | 33                              | (33, 66)     | 66                                  | (33, 66)     | 66                                 | (33, 99)     |
| 5th percentile                         | 33                      | (33, 33)    | 33                                | (33, 66)    | 66                              | (33, 66)     | 66                                  | (33, 99)     | 99                                 | (33, 99)     |

|                                  |     |            |     |             |     |            |     |            |     |            |
|----------------------------------|-----|------------|-----|-------------|-----|------------|-----|------------|-----|------------|
| 25th percentile                  | 66  | (66, 66)   | 99  | (99, 99)    | 99  | (99, 99)   | 132 | (99, 132)  | 132 | (132, 132) |
| Median (50th percentile)         | 99  |            | 132 |             | 132 |            | 165 |            | 165 |            |
| 75th percentile                  | 132 | (132, 132) | 165 | (165, 165)  | 165 | (165, 165) | 198 | (198, 198) | 198 | (198, 198) |
| 95th percentile                  | 165 | (165, 198) | 198 | (198, 198)  | 198 | (198, 231) | 231 | (231, 264) | 231 | (231, 264) |
| 97.5th percentile                | 198 | (165, 198) | 198 | (198, 231)  | 231 | (198, 231) | 264 | (231, 264) | 264 | (231, 264) |
| <b>UES Opening Duration (ms)</b> | -   | -          | -   | -           | -   | -          | -   | -          | -   | -          |
| N                                | 70  |            | 77  |             | 77  |            | 75  |            | 74  |            |
| Outliers (n)                     | 6   |            | 0   |             | 0   |            | 2   |            | 3   |            |
| 2.5th percentile                 | 396 | (363, 396) | 330 | (330, 363)  | 330 | (330, 363) | 297 | (297, 330) | 297 | (297, 297) |
| 5th percentile                   | 396 | (396, 396) | 363 | (330, 363)  | 363 | (330, 363) | 330 | (297, 330) | 297 | (297, 330) |
| 25th percentile                  | 429 | (429, 429) | 396 | (396, 396)  | 396 | (396, 396) | 363 | (363, 363) | 363 | (363, 363) |
| Median (50th percentile)         | 462 |            | 462 |             | 462 |            | 396 |            | 396 |            |
| 75th percentile                  | 528 | (495, 528) | 528 | (495, 528)  | 528 | (495, 528) | 429 | (429, 462) | 429 | (429, 462) |
| 95th percentile                  | 594 | (561, 627) | 594 | (561, 627)  | 594 | (561, 627) | 528 | (495, 528) | 495 | (495, 528) |
| 97.5th percentile                | 627 | (594, 660) | 627 | (594, 627)  | 627 | (594, 660) | 528 | (528, 561) | 528 | (495, 528) |
| <b>Time-to-LVC (ms)</b>          | -   | -          | -   | -           | -   | -          | -   | -          | -   | -          |
| N                                | 77  |            | 77  |             | 77  |            | 77  |            | 77  |            |
| Outliers (n)                     | 0   |            | 0   |             | 0   |            | 0   |            | 0   |            |
| 2.5th percentile                 | 33  | (33, 66)   | -99 | (-198, -66) | -33 | (-66, 0)   | 0   | (-66, 33)  | 33  | (33, 66)   |

|                                                  |     |             |     |            |     |            |     |            |     |            |
|--------------------------------------------------|-----|-------------|-----|------------|-----|------------|-----|------------|-----|------------|
| 5th percentile                                   | 66  | (33, 66)    | -66 | (-132, 0)  | 0   | (-33, 33)  | 33  | (-33, 66)  | 66  | (33, 66)   |
| 25th percentile                                  | 99  | (99, 99)    | 66  | (33, 66)   | 66  | (66, 99)   | 99  | (99, 99)   | 99  | (99, 99)   |
| Median (50th percentile)                         | 132 |             | 132 |            | 132 |            | 165 |            | 132 |            |
| 75th percentile                                  | 165 | (165, 198)  | 231 | (198, 231) | 198 | (198, 231) | 198 | (198, 231) | 165 | (165, 198) |
| 95th percentile                                  | 264 | (231, 264)  | 330 | (297, 363) | 330 | (297, 363) | 264 | (231, 297) | 264 | (231, 264) |
| 97.5th percentile                                | 264 | (231, 297)  | 363 | (330, 429) | 363 | (297, 396) | 297 | (264, 297) | 264 | (264, 297) |
| <b>LVC Duration (ms)</b>                         |     |             |     |            |     |            |     |            |     |            |
| N                                                | 75  | -           | 73  | -          | 76  | -          | 77  | -          | 74  | -          |
| Outliers (n)                                     | 0   |             | 4   |            | 1   |            | 0   |            | 3   |            |
| 2.5th percentile                                 | 297 | (264, 297)  | 297 | (297, 330) | 297 | (264, 297) | 297 | (297, 330) | 330 | (297, 330) |
| 5th percentile                                   | 297 | (297, 330)  | 330 | (297, 330) | 297 | (297, 330) | 330 | (297, 330) | 330 | (330, 363) |
| 25th percentile                                  | 396 | (396, 396)  | 396 | (396, 396) | 396 | (396, 396) | 396 | (363, 396) | 396 | (396, 396) |
| Median (50th percentile)                         | 462 |             | 462 |            | 462 |            | 429 |            | 429 |            |
| 75th percentile                                  | 627 | (561, 660)  | 561 | (528, 594) | 561 | (528, 561) | 528 | (495, 561) | 495 | (462, 528) |
| 95th percentile                                  | 858 | (759, 924)  | 726 | (660, 759) | 660 | (627, 726) | 693 | (627, 759) | 594 | (561, 627) |
| 97.5th percentile                                | 924 | (825, 1023) | 759 | (726, 825) | 726 | (660, 759) | 726 | (693, 726) | 627 | (594, 693) |
| <b>Vallecular Residue [% (C2-4)<sup>2</sup>]</b> |     |             |     |            |     |            |     |            |     |            |
| N                                                | 75  | -           | 77  | -          | 77  | -          | 77  | -          | 77  | -          |
| Outliers (n)                                     | 1   |             | 0   |            | 0   |            | 0   |            | 0   |            |

|                                                       |                    |            |                    |            |                    |            |                    |            |                    |            |
|-------------------------------------------------------|--------------------|------------|--------------------|------------|--------------------|------------|--------------------|------------|--------------------|------------|
| Minimum                                               |                    |            |                    |            |                    |            |                    |            |                    |            |
| 2.5th percentile                                      | 0                  | (0, 0)     | 0                  | (0, 0)     | 0                  | (0, 0)     | Unable to Estimate |            | Unable to Estimate |            |
| 5th percentile                                        | 0                  | (0, 0)     | 0                  | (0, 0)     | 0                  | (0, 0)     | Unable to Estimate |            | Unable to Estimate |            |
| 25th percentile                                       | 0                  | (0, 0)     | 0                  | (0, 0)     | 0                  | (0, 0)     | Unable to Estimate |            | Unable to Estimate |            |
| Median (50th percentile)                              | 0.1                |            | 0.1                |            | 0.1                |            | 0                  |            | 0                  |            |
| 75th percentile                                       | 1                  | (0.5, 0.9) | 1                  | (0.7, 1.3) | 1.1                | (0.8, 1.4) | 0.6                | (0.4, 0.8) | 0.5                | (0.4, 0.6) |
| 95th percentile                                       | 1.5                | (1.2, 1.8) | 2.4                | (1.9, 2.8) | 2.5                | (2, 3)     | 1.5                | (1.2, 1.7) | 1.3                | (1, 1.5)   |
| 97.5th percentile                                     | 1.8                | (1.5, 2.1) | 2.8                | (2.2, 3.4) | 3                  | (2.4, 3.6) | 1.8                | (1.4, 2.1) | 1.5                | (1.2, 1.8) |
| Maximum                                               |                    |            |                    |            |                    |            |                    |            |                    |            |
| % above 0                                             | 0.546666<br>667    |            | 0.532467<br>532    |            | 0.597402<br>597    |            | 0.493506<br>494    |            | 0.389610<br>39     |            |
| <b>Pyriiform Sinus Residue [% (C2-4)<sup>2</sup>]</b> |                    |            |                    |            |                    |            |                    |            |                    |            |
| N                                                     | 76                 | -          | 77                 | -          | 75                 | -          | 77                 | -          | 77                 | -          |
| Outliers (n)                                          | 0                  | -          | 0                  | -          | 2                  | -          | 0                  | -          | 0                  | -          |
| Minimum                                               |                    |            |                    |            |                    |            |                    |            |                    |            |
| 2.5th percentile                                      | Unable to Estimate |            |
| 5th percentile                                        | Unable to Estimate |            |
| 25th percentile                                       | Unable to Estimate |            |
| Median (50th percentile)                              | 0                  |            | 0                  |            | 0.1                |            | 0                  |            | 0                  |            |

|                                 |                           |            |                           |            |                 |              |                           |            |                           |
|---------------------------------|---------------------------|------------|---------------------------|------------|-----------------|--------------|---------------------------|------------|---------------------------|
| 75th percentile                 | <i>Unable to Estimate</i> |            | 0.6                       | (0.4, 0.9) | 0.4             | (0.3, 0.5)   | 0.5                       | (0.3, 0.7) | <i>Unable to Estimate</i> |
| 95th percentile                 | 1.6                       | (1.2, 2)   | 1.6                       | (1.1, 2.1) | 0.9             | (0.8, 1.1)   | 1.2                       | (0.8, 1.6) | <i>Unable to Estimate</i> |
| 97.5th percentile               | 1.9                       | (1.5, 2.4) | 1.9                       | (1.2, 2.6) | 1.1             | (0.9, 1.2)   | 1.4                       | (1, 2)     | <i>Unable to Estimate</i> |
| Maximum                         |                           |            |                           |            |                 |              |                           |            |                           |
| % above 0                       | 0.315789<br>474           |            | 0.376623<br>377           |            | 0.533333<br>333 |              | 0.376623<br>377           |            | 0.324675<br>325           |
| <b>Other Pharyngeal Residue</b> |                           |            |                           |            |                 |              |                           |            |                           |
| <b>[% (C2-4)<sup>2</sup>]</b>   | -                         | -          | -                         | -          | -               | -            | -                         | -          | -                         |
| N                               | 75                        |            | 77                        |            | 77              |              | 76                        |            | 75                        |
| Outliers (n)                    | 0                         |            | 0                         |            | 0               |              | 0                         |            | 0                         |
| Minimum                         | 0                         |            | 0                         |            | 0               |              | 0                         |            | 0                         |
| 2.5th percentile                | <i>Unable to Estimate</i> |            | <i>Unable to Estimate</i> |            | 0               | (0, 0)       | <i>Unable to Estimate</i> |            | <i>Unable to Estimate</i> |
| 5th percentile                  | <i>Unable to Estimate</i> |            | <i>Unable to Estimate</i> |            | 0               | (0, 0)       | <i>Unable to Estimate</i> |            | <i>Unable to Estimate</i> |
| 25th percentile                 | <i>Unable to Estimate</i> |            | <i>Unable to Estimate</i> |            | 0               | (0, 0)       | <i>Unable to Estimate</i> |            | <i>Unable to Estimate</i> |
| Median (50th percentile)        | 0                         |            | 0                         |            | 0               |              | 0                         |            | 0                         |
| 75th percentile                 | <i>Unable to Estimate</i> |            | <i>Unable to Estimate</i> |            | 0.6             | (0.46, 0.74) | <i>Unable to Estimate</i> |            | <i>Unable to Estimate</i> |
| 95th percentile                 | <i>Unable to Estimate</i> |            | <i>Unable to Estimate</i> |            | 1.48            | (1.2, 1.76)  | <i>Unable to Estimate</i> |            | <i>Unable to Estimate</i> |
| 97.5th percentile               | <i>Unable to Estimate</i> |            | <i>Unable to Estimate</i> |            | 1.77            | (1.43, 2.13) | <i>Unable to Estimate</i> |            | <i>Unable to Estimate</i> |
| Maximum                         | 1.3                       |            | 2.2                       |            | 2.4             |              | 5.05                      |            | 5.85                      |
| % above 0                       | 20%                       |            | 29%                       |            | 39%             |              | 29%                       |            | 19%                       |

| <b>Total Residue [% (C2-4)²]</b>       | -    | -            | -    | -            | -    | -            | -    | -            | -    |              |
|----------------------------------------|------|--------------|------|--------------|------|--------------|------|--------------|------|--------------|
| N                                      | 73   |              | 72   |              | 73   |              | 70   |              | 74   |              |
| Outliers (n)                           | 2    |              | 5    |              | 4    |              | 6    |              | 1    |              |
| 2.5th percentile                       | 0    | (0, 0)       | 0    | (0, 0)       | 0    | (0, 0)       | 0    | (0, 0)       | 0    | (0, 0)       |
| 5th percentile                         | 0    | (0, 0)       | 0    | (0, 0)       | 0    | (0, 0)       | 0    | (0, 0)       | 0    | (0, 0)       |
| 25th percentile                        | 0    | (0, 0)       | 0    | (0, 0)       | 0    | (0, 0)       | 0    | (0, 0)       | 0    | (0, 0)       |
| Median (50th percentile)               | 0.1  |              | 0.2  |              | 0.3  |              | 0.2  |              | 0.1  |              |
| 75th percentile                        | 1    | (1, 1.8)     | 1.2  | (0.9, 1.5)   | 1.7  | (1.2, 2.1)   | 0.7  | (0.6, 0.9)   | 1.2  | (0.9, 1.5)   |
| 95th percentile                        | 3.2  | (2.6, 3.8)   | 2.7  | (2.3, 3.2)   | 3.7  | (3.1, 4.3)   | 1.5  | (1.3, 1.8)   | 2.9  | (2.3, 3.5)   |
| 97.5th percentile                      | 3.8  | (3.2, 4.5)   | 3.2  | (2.6, 3.7)   | 4.3  | (3.7, 5)     | 1.8  | (1.5, 2)     | 3.4  | (2.8, 4)     |
| <b>Maximum UES Diameter [% (C2-4)]</b> | -    | -            | -    | -            | -    | -            | -    | -            | -    |              |
| N                                      | 75   |              | 76   |              | 76   |              | 77   |              | 76   |              |
| Outliers (n)                           | 1    |              | 1    |              | 1    |              | 0    |              | 1    |              |
| 2.5th percentile                       | 9.4  | (7.8, 363)   | 9.2  | (8, 10.4)    | 9.2  | (7.9, 10.4)  | 7.9  | (7, 8.8)     | 8.9  | (7.7, 330)   |
| 5th percentile                         | 11.1 | (9.7, 12.7)  | 10.4 | (9.3, 11.5)  | 10.7 | (9.4, 11.9)  | 8.8  | (8, 9.7)     | 330  | (9, 11.2)    |
| 25th percentile                        | 17   | (16, 561)    | 14.8 | (14.3, 15.1) | 15.4 | (21.2, 23.6) | 12.2 | (11.9, 12.7) | 13.8 | (13.4, 14.2) |
| Median (50th percentile)               | 20.5 |              | 18.9 |              | 18.6 |              | 495  |              | 16.4 |              |
| 75th percentile                        | 24   | (23.2, 25.9) | 23.1 | (21.7, 24.5) | 22.4 | (21.2, 23.6) | 18.7 | (17.6, 19.9) | 19.5 | (18.5, 20.5) |
| 95th percentile                        | 30.2 | (28.7, 32.1) | 29.2 | (27.5, 31.3) | 27.9 | (26.4, 29.4) | 24.1 | (22.5, 25.8) | 24   | (22.8, 25.2) |

|                                                       |      |              |      |              |      |              |      |              |      |              |
|-------------------------------------------------------|------|--------------|------|--------------|------|--------------|------|--------------|------|--------------|
| 97.5th percentile                                     | 32.1 | (30.5, 34.1) | 31.2 | (29.4, 33.3) | 29.7 | (28, 31.5)   | 25.9 | (24.1, 27.7) | 25.5 | (24, 26.9)   |
| <b>Pharyngeal Area at Maximum</b>                     |      |              |      |              |      |              |      |              |      |              |
| <b>Pharyngeal Constriction [% (C2-4)<sup>2</sup>]</b> |      |              | -    | -            | -    | -            | -    | -            | -    | -            |
| N                                                     | 69   |              | 67   |              | 76   |              | 70   |              | 75   |              |
| Outliers (n)                                          | 7    |              | 10   |              | 1    |              | 7    |              | 2    |              |
| 2.5th percentile                                      | 0    | (NaN, 0)     | 0    | (0, 0)       | 0    | (0, 0)       | 0    | (0, 0)       | 0    | (0, 0)       |
| 5th percentile                                        | 0    | (NaN, 0)     | 0    | (0, 0)       | 0    | (0, 0)       | 0    | (0, 0)       | 0    | (0, 0)       |
| 25th percentile                                       | 0    | (0, 0.2)     | 0.1  | (0.1, 0.5)   | 0.2  | (0.1, 0.5)   | 0    | (0, 0.1)     | 0    | (0, 0)       |
| Median (50th percentile)                              | 0.7  |              | 0.7  |              | 1.2  |              | 0.4  |              | 0.2  |              |
| 75th percentile                                       | 2    | (1.3, 2)     | 1.7  | (1.3, 2)     | 3    | (2.5, 3.6)   | 1.1  | (0.8, 1.4)   | 1.2  | (0.9, 1.5)   |
| 95th percentile                                       | 3    | (2.6, 3.5)   | 3.1  | (2.6, 3.5)   | 5.7  | (4.8, 6.6)   | 2.1  | (1.8, 2.4)   | 2.6  | (2.2, 3)     |
| 97.5th percentile                                     | 3.5  | (3, 3.9)     | 3.5  | (3.0, 4.0)   | 6.5  | (5.6, 7.4)   | 2.4  | (2.1, 2.7)   | 3.1  | (2.6, 3.6)   |
| <b>Pharyngeal Area at Rest [% (C2-4)<sup>2</sup>]</b> |      |              |      |              |      |              |      |              |      |              |
|                                                       | -    | -            | -    | -            | -    | -            | -    | -            | -    | -            |
| N                                                     | 66   |              | 70   |              | 69   |              | 70   |              | 70   |              |
| Outliers (n)                                          | 0    |              | 2    |              | 1    |              | 2    |              | 0    |              |
| 2.5th percentile                                      | 36.3 | (33.5, 39.2) | 36.4 | (33.6, 39.2) | 33   | (29.7, 36.4) | 35.7 | (32.9, 38.5) | 35.7 | (32.4, 38.4) |
| 5th percentile                                        | 39.1 | (36.3, 41.6) | 39.5 | (36.6, 42.6) | 36.7 | (33.2, 40.1) | 38.6 | (35.7, 41.1) | 38.4 | (35.6, 41.1) |
| 25th percentile                                       | 50   | (48.2, 50.8) | 50.3 | (49.4, 51.6) | 49.6 | (48.1, 51.2) | 49.1 | (47.9, 50)   | 48.6 | (47.3, 49.6) |
| Median (50th percentile)                              | 59.1 |              | 60.5 |              | 58.9 |              | 59.1 |              | 57.5 |              |

|                                |       |               |      |              |      |              |      |              |      |               |
|--------------------------------|-------|---------------|------|--------------|------|--------------|------|--------------|------|---------------|
| 75th percentile                | 74    | (69.6, 79.9)  | 71   | (67.9, 74.6) | 71.5 | (67.4, 75.8) | 71.5 | (67.7, 75.4) | 73.7 | (68.9, 79.3)  |
| 95th percentile                | 96.8  | (88.5, 105.1) | 86.5 | (81.4, 91.1) | 89.8 | (84.3, 95.6) | 89.8 | (84.2, 95.9) | 97.2 | (87.6, 106.4) |
| 97.5th percentile              | 104.2 | (95.5, 114.3) | 91.6 | (86.5, 97.2) | 95.9 | (90, 102.2)  | 95.8 | (89.3, 102)  | 105  | (94.6, 116.1) |
| <b>Peak Hyoid</b>              |       |               |      |              |      |              |      |              |      |               |
| <b>Position - X [% (C2-4)]</b> |       |               |      |              |      |              |      |              |      |               |
| N                              | 71    | -             | 72   | -            | 72   | -            | 69   | -            | 70   | -             |
| Outliers (n)                   | 0     | -             | 0    | -            | 0    | -            | 0    | -            | 0    | -             |
| 2.5th percentile               | 122   | (120, 125)    | 119  | (116, 121)   | 121  | (119, 126)   | 120  | (118, 122)   | 120  | (118, 124)    |
| 5th percentile                 | 125   | (122, 128)    | 122  | (119, 124)   | 124  | (122, 128)   | 123  | (120, 125)   | 123  | (120, 127)    |
| 25th percentile                | 134   | (133, 135)    | 132  | (130, 133)   | 134  | (133, 137)   | 132  | (131, 133)   | 134  | (133, 135)    |
| Median (50th percentile)       | 142   | -             | 141  | -            | 143  | -            | 140  | -            | 143  | -             |
| 75th percentile                | 156   | (151, 160)    | 154  | (150, 159)   | 155  | (151, 159)   | 152  | (148, 156)   | 154  | (151, 158)    |
| 95th percentile                | 176   | (169, 183)    | 174  | (166, 182)   | 173  | (167, 180)   | 170  | (164, 177)   | 171  | (166, 178)    |
| 97.5th percentile              | 182   | (174, 191)    | 181  | (173, 190)   | 179  | (171, 187)   | 176  | (169, 183)   | 177  | (171, 184)    |
| <b>Peak Hyoid</b>              |       |               |      |              |      |              |      |              |      |               |
| <b>Position - Y [% (C2-4)]</b> |       |               |      |              |      |              |      |              |      |               |
| N                              | 70    | -             | 72   | -            | 71   | -            | 67   | -            | 69   | -             |
| Outliers (n)                   | 1     | -             | 0    | -            | 1    | -            | 2    | -            | 1    | -             |
| 2.5th percentile               | 40    | (32, 48)      | 39   | (31, 46)     | 52   | (45, 58)     | 47   | (41, 53)     | 42   | (33, 50)      |





|                          |     |            |     |            |     |            |     |            |     |            |
|--------------------------|-----|------------|-----|------------|-----|------------|-----|------------|-----|------------|
| N                        | 71  |            | 71  |            | 70  |            | 69  |            | 70  |            |
| Outliers (n)             | 0   |            | 1   |            | 2   |            | 1   |            | 0   |            |
| 2.5th percentile         | 71  | (65, 79)   | 67  | (63, 72)   | 73  | (69, 77)   | 61  | (54, 67)   | 67  | (63, 71)   |
| 5th percentile           | 79  | (71, 85)   | 73  | (68, 77)   | 78  | (73, 82)   | 67  | (61, 74)   | 71  | (68, 75)   |
| 25th percentile          | 103 | (100, 105) | 94  | (92, 96)   | 96  | (94, 98)   | 89  | (87, 91)   | 89  | (87, 91)   |
| Median (50th percentile) | 122 |            | 113 |            | 114 |            | 104 |            | 105 |            |
| 75th percentile          | 142 | (136, 149) | 146 | (135, 156) | 139 | (131, 148) | 122 | (115, 128) | 138 | (128, 148) |
| 95th percentile          | 171 | (161, 180) | 193 | (180, 208) | 176 | (166, 188) | 148 | (140, 157) | 187 | (171, 202) |
| 97.5th percentile        | 180 | (170, 191) | 209 | (195, 227) | 189 | (175, 202) | 157 | (148, 166) | 203 | (186, 221) |

ms = milliseconds; LVC = Laryngeal Vestibule Closure; UES = Upper Esophageal Sphincter
